# Supplementary material for: Can terdentate 2,6-bis(1,2,3-triazol-4-yl)pyridines form stable coordination compounds?
Source: Royal Society of Chemistry journal article supplement (doi:10.1039/b703301j), 2007-01-01
Supplement: b703301j.pdf [file b703301j.pdf]

# ***Chemical Communications***

## **Supporting Information**

### **Can Terdentate 2,6-Bis(1,2,3-Triazol-4-yl)Pyridines form Stable Coordination Compounds?**

*Yongjun Li,<sup>a</sup> John C. Huffman,<sup>a,b</sup> Amar H. Flood<sup>a\*</sup>*

<sup>a</sup> Chemistry Department, Indiana University, 800 East Kirkwood Avenue, Bloomington, IN 47405

<sup>b</sup> Molecular Structure Center, Indiana University

#### **Table of Contents**

|      |                                                                                                                         |     |
|------|-------------------------------------------------------------------------------------------------------------------------|-----|
| S.1. | EXPERIMENTAL                                                                                                            | S2  |
| S.2. | CRYSTAL STRUCTURE ANALYSIS                                                                                              | S10 |
| S.3. | <sup>1</sup> H NMR SPECTROSCOPY                                                                                         | S12 |
| S.4. | MOLECULAR MODELING OF THE SOFTENED<br>GEOMETRICAL CONSTRAINTS FOR THE TRIPY CORE<br>MOTIF IN AN OCTAHEDRAL FIELD        | S17 |
| S.5. | ELECTROCHEMISTRY                                                                                                        | S18 |
| S.6. | CHARACTERIZATION OF REDOX-STIMULATED<br>AQUATION OF [Fe( <b>1</b> ) <sub>2</sub> ] <sup>3+</sup> USING ELECTROCHEMISTRY | S24 |
| S.7. | EMISSION SPECTROSCOPY                                                                                                   | S28 |
| S.8. | <sup>13</sup> C NMR AND MASS SPECTRA                                                                                    | S31 |
| S.9. | REFERENCES                                                                                                              | S37 |

## S.1. EXPERIMENTAL

### General

All reagents were obtained from commercial sources and used as received unless otherwise noted. The compounds 2,6-diethynylpyridine,<sup>1</sup> 3-azidopropan-1-ol,<sup>2</sup> 1-azidobutane<sup>3</sup> and Ru(DMSO)<sub>4</sub>Cl<sub>2</sub><sup>4</sup> were prepared according to literature procedures. Column chromatography was performed on silica gel (160 – 200 mesh), and thin-layer chromatography (TLC) was performed on precoated silica gel plates (0.25 mm thick, 60F<sub>254</sub>, Merck, Germany) and observed under UV light. Nuclear magnetic resonance (NMR) spectra were recorded on Varian Inova (400 MHz), Varian Vxr (400 MHz) and Varian Gemini (300 MHz) spectrometers at room temperature (298 K). Chemical shifts were reported versus tetramethylsilane and referenced to the residual solvent peaks. High resolution chemical ionization (CI) and electrospray ionization (ESI) mass spectrometry were performed on a Thermo Electron Corporation MAT 95XP-Trap mass spectrometer. UV-Vis spectra were measured on a Varian Cary 5000 UV-Vis-NIR spectrophotometer. FT-IR spectra were recorded on a Nicolet 510P FT-IR Spectrometer with EZ OMNIC E.S.P. software. Elemental analyses (CHN) were performed at the Robertson Microlit Laboratories.

**Safety Comment:** Sodium azide is very toxic, personal protection precautions should be taken. As low molecular weight organic azides and ClO<sub>4</sub><sup>-</sup> salts are potential explosives, care must be taken during their handling. Generally, when the total number of carbon ( $N_C$ ) plus oxygen ( $N_O$ ) atoms is less than the total numbers of nitrogen atoms ( $N_N$ ) by a ratio of three, i.e.,  $(N_C + N_O) / N_N < 3$ , the compound is considered as an explosive hazard. In those instances, the compound was prepared prior to use and used immediately. A standard PVC blast shield was used when necessary.

### Electrochemistry

Cyclic voltammetry (CV) was performed using a Princeton Applied Research potentiostat/galvanostat model 263A. Anhydrous MeCN (Aldrich) was used as the solvent under inert atmosphere (Ar) and 0.1 M tetra(*n*-butyl)ammonium hexafluorophosphate (TBAPF<sub>6</sub>) was used as the supporting electrolyte. The TBAPF<sub>6</sub> was recrystallized twice from EtOH. A glassy

carbon rod was used as the working electrode, a platinum wire was used as the counter electrode, and a silver wire was used as a pseudoreference electrode. The redox potentials are reported relative to the standard calomel electrode (SCE) redox couple and these calibrated data were obtained by addition of the SCE to the solution at the end of the experiments.

### X-ray Crystallography

**Data Collection:** Diffraction data for  $[\text{Fe}(\mathbf{1})_2] \cdot 2\text{PF}_6$ ,  $[\text{Ru}(\mathbf{1})_2] \cdot 2\text{PF}_6$  and  $[\text{Eu}(\mathbf{2})_3] \cdot 3\text{ClO}_4$  were collected at 177, 125 and 135 K, respectively. The data sets were collected on a Bruker SMART 6000 CCD diffractometer. A preliminary set of cell constants was calculated from reflections obtained from three nearly orthogonal sets of 30, 20 and 30 frames, respectively. The data collection was carried out using graphite monochromated Mo  $K\alpha$  radiation with a frame time of 15, 15 and 30 s, respectively, and a detector distance of 5.0 cm. A randomly oriented region of a sphere in reciprocal space was surveyed. Three sections of 606 frames were collected with  $0.30^\circ$  steps in  $\omega$  at different  $\phi$  settings with the detector set at  $-43^\circ$  in  $2\theta$ . The intensity data for  $[\text{Eu}(\mathbf{2})_3] \cdot 3\text{ClO}_4$  were corrected for absorption (SADABS).<sup>5</sup> Final cell constants were calculated from the  $xyz$  centroids of 872 ( $[\text{Fe}(\mathbf{1})_2] \cdot 2\text{PF}_6$ ), 1965 ( $[\text{Ru}(\mathbf{1})_2] \cdot 2\text{PF}_6$ ) or 2045 ( $[\text{Eu}(\mathbf{2})_3] \cdot 3\text{ClO}_4$ ) strong reflections from the actual data collection after integration (SAINT).<sup>6</sup>

**Structure Solution and Refinement:** Intensity statistics and systematic absences suggested the centrosymmetric space group  $C2/c$  ( $[\text{Fe}(\mathbf{1})_2] \cdot 2\text{PF}_6$ ),  $P2_1/c$  ( $[\text{Ru}(\mathbf{1})_2] \cdot 2\text{PF}_6$ ) and the orthorhombic centrosymmetric space group  $Pbcn$  ( $[\text{Eu}(\mathbf{2})_3] \cdot 3\text{ClO}_4$ ), and subsequent solution and refinement confirmed these choices. The structure was solved (Table S1) using SHELXS-97 and refined with SHELXL-97.<sup>7</sup> A direct-methods solution was calculated which provided most non-hydrogen atoms from the  $E$ -map. Full-matrix least squares / difference Fourier cycles were performed which located the remaining non-hydrogen atoms. All non-hydrogen atoms were refined with anisotropic displacement parameters. For  $[\text{Fe}(\mathbf{1})_2] \cdot 2\text{PF}_6$ , one peak was located near a center of inversion and arises from the partial occupancy by a molecule of  $\text{H}_2\text{O}$ . Two other crystals were examined in an attempt to better characterize the solvent, but to no avail. For both  $[\text{Fe}(\mathbf{1})_2] \cdot 2\text{PF}_6$  and  $[\text{Ru}(\mathbf{1})_2] \cdot 2\text{PF}_6$ , all hydrogen atoms were located in subsequent Fourier maps and included as isotropic contributors in the final cycles of refinement. For  $[\text{Eu}(\mathbf{2})_3] \cdot 3\text{ClO}_4$ , there are four independent perchlorate groups, two lying on symmetry elements, and there is some

disorder in two of the perchlorate groups, and two of the *n*-butyl chains are disordered. In addition, there is a single peak located at (0.91, 0.12, 0.79) that lies nearly 3 Å from any other non-hydrogen atom. It was assumed to be an oxygen atom from a water solvent in the refinement. All hydrogen atoms were located in subsequent Fourier maps and included as isotropic contributors in the final cycles of refinement. The 50% thermal ellipsoids for each crystal structure are shown in Figure S1.

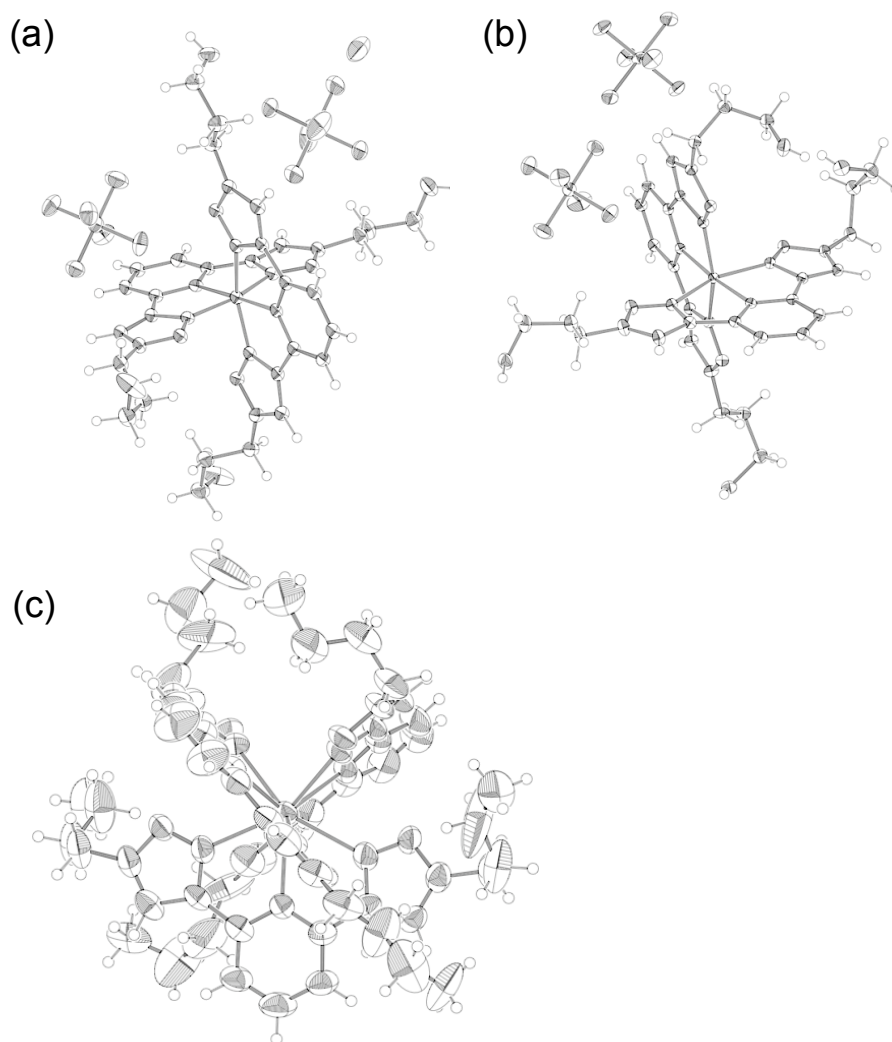

**Figure S1.** 50% Ellipsoids of (a) [Fe(1)<sub>2</sub>]•2PF<sub>6</sub>, (b) [Ru(1)<sub>2</sub>]•2PF<sub>6</sub> and (c) [Eu(2)<sub>3</sub>]•3ClO<sub>4</sub>.

**Table S1.** A summary of the refinement details and the resulting factors for [Fe(1)<sub>2</sub>]•2PF<sub>6</sub>, [Ru(1)<sub>2</sub>]•2PF<sub>6</sub> and [Eu(2)<sub>3</sub>]•3ClO<sub>4</sub>.

|                     |                                                                                                 |                                                                                                  |                                                                                   |
|---------------------|-------------------------------------------------------------------------------------------------|--------------------------------------------------------------------------------------------------|-----------------------------------------------------------------------------------|
| Empirical Formula:  | C <sub>30</sub> H <sub>38</sub> F <sub>12</sub> FeN <sub>14</sub> O <sub>4</sub> P <sub>2</sub> | C <sub>30</sub> H <sub>38</sub> F <sub>12</sub> N <sub>14</sub> O <sub>4</sub> P <sub>2</sub> Ru | C <sub>51</sub> H <sub>71</sub> Cl <sub>3</sub> EuN <sub>21</sub> O <sub>13</sub> |
| Color of Crystal:   | orange                                                                                          | yellow                                                                                           | colorless                                                                         |
| Crystal System:     | Monoclinic                                                                                      | Monoclinic                                                                                       | Orthorhombic                                                                      |
| Space Group:        | C2/c                                                                                            | P2(1)/c                                                                                          | Pbcn                                                                              |
| Crystal size:       | 0.26 × 0.18 × 0.11 mm                                                                           | 0.35 × 0.20 × 0.12 mm                                                                            | 0.30 × 0.25 × 0.10 mm                                                             |
| Instrument:         | IUMSC SMART6000                                                                                 |                                                                                                  |                                                                                   |
| Cell Dimensions     |                                                                                                 |                                                                                                  |                                                                                   |
| Data                | 872 reflections; 173 K                                                                          | 1965 reflections; 125 K                                                                          | 2045 reflections; 135 K                                                           |
| a =                 | 11.156(3)                                                                                       | 12.2491(8)                                                                                       | 19.2068(17)                                                                       |
| b =                 | 26.836(3)                                                                                       | 23.2119(15)                                                                                      | 28.499(3)                                                                         |
| c =                 | 14.153(3)                                                                                       | 14.9526(10)                                                                                      | 24.321(2)                                                                         |
| alpha =             | 90                                                                                              | 90                                                                                               | 90                                                                                |
| beta =              | 104.726(5)                                                                                      | 108.375(2)                                                                                       | 90                                                                                |
| gamma =             | 90                                                                                              | 90                                                                                               | 90                                                                                |
| Z (Molecules/Cell): | 4                                                                                               | 4                                                                                                | 8                                                                                 |
| Volume:             | 4097.98(16)                                                                                     | 4034.6(5)                                                                                        | 13313(2)                                                                          |
| Calculated Density: | 1.657                                                                                           | 1.728                                                                                            | 1.441                                                                             |
| Molecular Weight:   | 1022.51                                                                                         | 1049.75                                                                                          | 1444.60                                                                           |
| Linear Abs. Coef.:  | 0.556                                                                                           | 0.580                                                                                            | 1.136                                                                             |
| Final Residuals:    |                                                                                                 |                                                                                                  |                                                                                   |
| R(F) =              | 0.042                                                                                           | 0.0299                                                                                           | 0.0638                                                                            |
| Rw(F) =             | 0.102                                                                                           | 0.0729                                                                                           | 0.1915                                                                            |

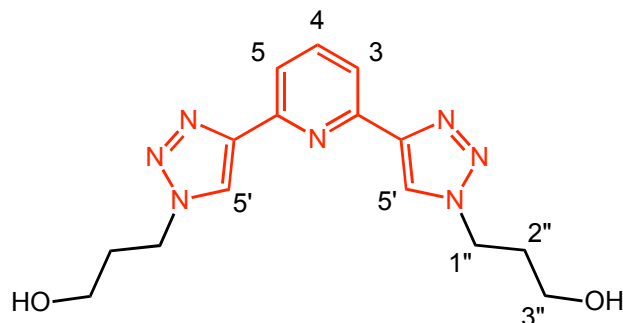

**2,6-bis(1-propan-1-ol-1,2,3-triazol-4-yl)pyridine, 1:** A solution of 2,6-diethynylpyridine (1 mmol, 127 mg), 3-azidopropan-1-ol (2.2 mmol, 222 mg, ( $N_C + N_O$ ) /  $N_N = 1.3$ ; *potentially explosive*), sodium ascorbate (0.2 mmol, 44.6 mg), and  $\text{CuSO}_4$  (0.02 mmol, 5.6 mg) in a 1:1 mixture of  $\text{EtOH}:\text{H}_2\text{O}$  (14 mL) was stirred at room temperature for 24 h. After removal of the solvents in vacuo, the crude product was purified by column chromatography ( $\text{CH}_2\text{Cl}_2:\text{MeOH}$ , 3:1) to afford **1** (309 mg, 94%).  $^1\text{H}$  NMR ( $\text{CD}_3\text{COCD}_3$ , 400 MHz),  $\delta$  = 8.50 (s, 2H), 8.03 (d, 2H,  $J$  = 7.6 Hz), 7.96 (t, 1H,  $J$  = 7.6 Hz), 4.61 (t, 4H,  $J$  = 6.8 Hz), 3.83 (s, br, 2H), 3.63 (s, br, 4H), 2.20~2.14 (m, 4H).  $^{13}\text{C}$  NMR ( $\text{CD}_3\text{COCD}_3$ , 75 MHz),  $\delta$  = 152.4, 149.6, 139.5, 124.8, 120.1, 59.9, 48.9, 34.9. IR (KBr)  $\nu$  = 3336, 3161, 3122, 2955, 2908, 2877, 1607, 1577, 1455, 1414, 1334, 1230, 1200, 1076, 1045, 812  $\text{cm}^{-1}$ . MS (HiResEI) Calcd for  $\text{C}_{15}\text{H}_{20}\text{N}_7\text{O}_2(\text{M}+\text{H})$  330.1673; Found 330.1676. Anal. Calcd for  $\text{C}_{15}\text{H}_{19}\text{N}_7\text{O}_2$ : C, 54.70; H, 5.81; N, 29.77. Found: C, 54.59; H, 5.80; N, 29.46.

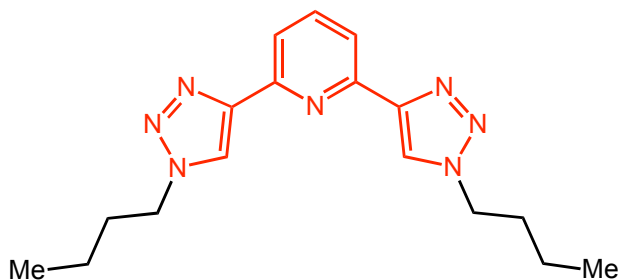

**2,6-bis(1-butyl-1H-1,2,3-triazol-4-yl)pyridine, 2:** A solution of 2,6-diethynylpyridine (0.5 mmol, 64 mg), 1-azidobutane (1.1 mmol, 109 mg, ( $N_C + N_O$ ) /  $N_N = 1.3$ ; *potentially explosive*), sodium ascorbate (0.1 mmol, 222.3 mg), and  $\text{CuSO}_4$  (0.01 mmol, 2.8 mg) in a 1:1 mixture of  $\text{EtOH}:\text{H}_2\text{O}$  (10 mL) was stirred at room temperature for 24 h. After removal of the solvents under vacuum, the crude product was purified by column chromatography ( $\text{CH}_2\text{Cl}_2:\text{MeOH}$ , 3:1) to afford **2** (156 mg, 96%).  $^1\text{H}$  NMR ( $\text{CDCl}_3$ , 400 MHz),  $\delta$  = 8.16 (s, 2H), 8.09 (d, 2H,  $J$  = 8.0 Hz), 7.86 (t, 1H,  $J$  = 7.6 Hz), 4.43 (t, 4H,  $J$  = 7.6 Hz), 2.00~1.92 (m, 4H), 1.45~1.36 (m, 4H),

0.98 (t, 6H,  $J = 7.6$  Hz).  $^{13}\text{C}$  NMR ( $\text{CDCl}_3$ , 100 MHz),  $\delta = 150.0, 148.2, 137.7, 121.9, 119.1, 50.1, 32.1, 19.5, 13.3$ . IR (KBr)  $\nu = 3130, 3107, 3072, 2955, 2932, 2866, 1604, 1573, 1460, 1441, 1371, 1254, 1204, 1048, 827\text{ cm}^{-1}$ . MS (HiResEI) Calcd for  $\text{C}_{17}\text{H}_{24}\text{N}_7$  ( $\text{M}+\text{H}$ ) 326.2088; Found 326.2092. Anal. Calcd for  $\text{C}_{17}\text{H}_{23}\text{N}_7$ : C, 62.75; H, 7.12; N, 30.13. Found: C, 62.58; H, 6.90; N, 30.21.

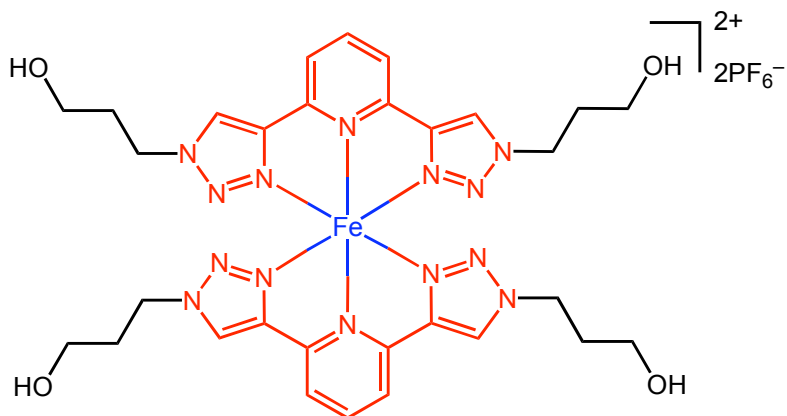

**[Fe(1)<sub>2</sub>]•2PF<sub>6</sub>:** A solution of  $\text{FeSO}_4$  (0.36 mmol, 100 mg) in  $\text{H}_2\text{O}$  (100 mL) was added to a solution of **1** (0.21 mmol, 69 mg) in hot  $\text{CH}_3\text{COCH}_3$ . The solution, which immediately turned yellow-brown, was heated to  $55\text{ }^\circ\text{C}$  for 30 min, after which time the  $\text{CH}_3\text{COCH}_3$  was evaporated. The iron complex was then precipitated by the addition of a saturated solution of  $\text{KPF}_6$  (100 mL). The suspension was left for 2 h at  $4\text{ }^\circ\text{C}$  and the ensuing solid was filtered off, washed with  $\text{H}_2\text{O}$ , and dried under vacuum. Recrystallization by slow diffusion of ether into an MeCN solution of  $[\text{Fe}(\mathbf{1})_2]\cdot 2\text{PF}_6$  yielded brown X-ray quality crystals (100 mg, 95% yield).  $^1\text{H}$  NMR ( $\text{CD}_3\text{COCD}_3$ , 400 MHz),  $\delta = 9.20$  (s, 4H), 8.81 (d, 4H,  $J = 5.6$  Hz), 8.56 (t, 2H,  $J = 7.2$  Hz), 4.59~4.46 (m, 8H), 3.67 (s, br, 4H), 3.36~3.31 (m, 8H), 1.95~1.82 (m, 8H).  $^{13}\text{C}$  NMR ( $\text{CD}_3\text{CN}$ , 75 MHz),  $\delta = 153.7, 149.0, 140.5, 126.0, 122.5, 58.6, 50.76, 32.9$ . IR (KBr)  $\nu = 3359, 3138, 2955, 2897, 1631, 1592, 1468, 1430, 1402, 1273, 1215, 1126, 1052, 846, 555\text{ cm}^{-1}$ . MS (HiResESI) Calcd for  $\text{C}_{30}\text{H}_{38}\text{F}_6\text{FeN}_{14}\text{O}_4\text{P}$  ( $\text{M}-\text{PF}_6$ )<sup>+</sup> 859.2192, Found 859.2262. Anal Calcd for  $\text{C}_{30}\text{H}_{38}\text{F}_{12}\text{FeN}_{14}\text{O}_4\text{P}_2$ : C, 35.87; H, 3.81; N, 19.52. Found: C, 36.00; H, 3.99; N, 19.50.

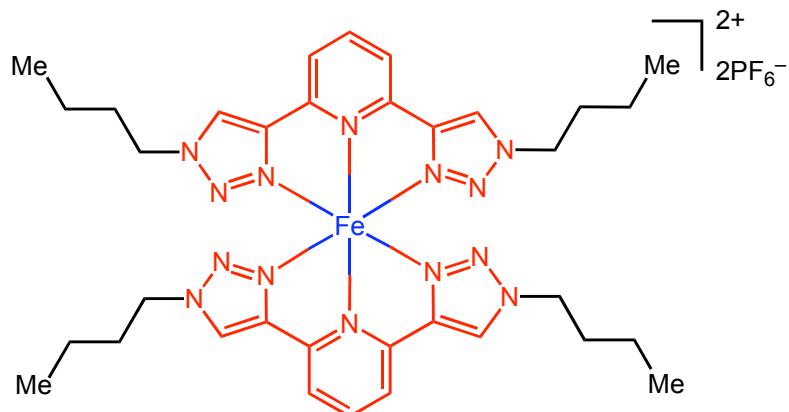

**[Fe(2)<sub>2</sub>]•2PF<sub>6</sub>:** This compound was prepared in the same manner as for [Fe(1)<sub>2</sub>]•2PF<sub>6</sub>, to produce a brown solid (94 mg, 90% yield) after isolation. <sup>1</sup>H NMR (CD<sub>3</sub>COCD<sub>3</sub>, 400 MHz), δ = 9.24 (s, 4H), 8.83 (d, 4H, *J* = 7.2 Hz), 8.56 (t, 2H, *J* = 7.5 Hz), 4.42 (t, 8H, *J* = 7.2 Hz), 1.74~1.64 (m, 8H), 1.08~0.98 (m, 8H), 0.72 (t, 12H, *J* = 7.2 Hz). <sup>13</sup>C NMR (CD<sub>3</sub>COCD<sub>3</sub>, 75 MHz), δ = 154.4, 150.1, 141.5, 126.8, 124.0, 54.2, 33.4, 20.8, 14.4. IR (KBr) ν = 3146, 2959, 2939, 2874, 1631, 1592, 1464, 1433, 1348, 1270, 1211, 1134, 843, 559 cm<sup>-1</sup>. MS (HiResESI) calcd for C<sub>34</sub>H<sub>48</sub>F<sub>6</sub>FeN<sub>14</sub>P (M-PF<sub>6</sub>+2H)<sup>+</sup> 853.3178, C<sub>34</sub>H<sub>46</sub>FeN<sub>14</sub> (M-2PF<sub>6</sub>)<sup>2+</sup> 354.1763, found 853.3040, 354.1674. Anal. Calcd for C<sub>34</sub>H<sub>46</sub>F<sub>12</sub>FeN<sub>14</sub>P<sub>2</sub>: C, 40.98; H, 4.65; N, 19.68. Found: C, 41.16; H, 4.83; N, 19.77.

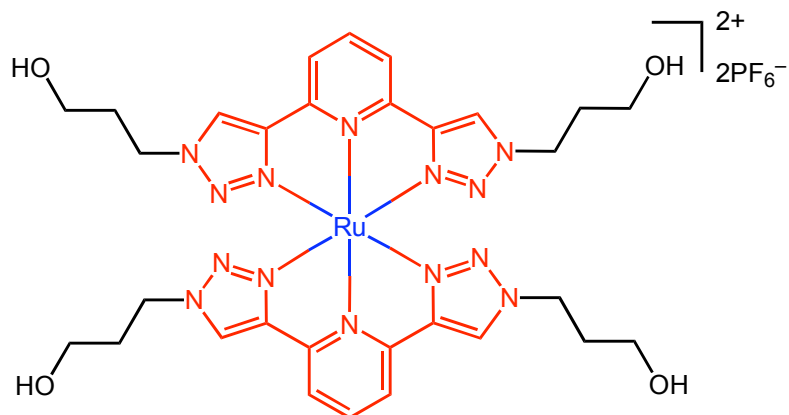

**[Ru(1)<sub>2</sub>]•2PF<sub>6</sub>:** The ligand **1** (0.21 mmol, 69 mg) in 10 mL ethylene glycol was added to the ruthenium(II) precursor Ru(DMSO)<sub>4</sub>Cl<sub>2</sub> (0.1 mmol, 46 mg) in 4 mL 1:1 MeOH:H<sub>2</sub>O. The mixture was heated under N<sub>2</sub> at 100 °C for 2.5 h, producing a yellow solution, which was then cooled to room temperature. Water was added to reach a total volume of 36 mL and solid NH<sub>4</sub><sup>+</sup>PF<sub>6</sub><sup>-</sup> was added whereupon a yellow precipitate formed. The precipitate was washed thoroughly with H<sub>2</sub>O and dried under vacuum. Recrystallization by slow diffusion of ether into



an MeCN solution of  $[\text{Ru}(\mathbf{1})_2] \cdot 2\text{PF}_6$  yielded X-ray quality crystals (87 mg, 92% yield).  $^1\text{H}$  NMR ( $\text{CD}_3\text{COCD}_3$ , 400 MHz),  $\delta$  = 9.13 (s, 4H), 8.47 (d, 4H,  $J$  = 6.4 Hz), 8.44~8.42 (m, 2H), 4.48 (t, 8H,  $J$  = 7.2 Hz), 3.70 (t, 4H,  $J$  = 4.8 Hz), 3.39~3.36 (m, 8H), 1.94~1.90 (m, 8H).  $^{13}\text{C}$  NMR ( $\text{CD}_3\text{CN}$ , 75 MHz),  $\delta$  = 151.6, 150.2, 138.6, 126.5, 120.7, 58.6, 50.3, 32.8. IR (KBr)  $\nu$  = 3414, 3138, 2944, 2878, 1623, 1584, 1460, 1430, 1402, 1344, 1266, 1208, 1127, 1052, 839, 554  $\text{cm}^{-1}$ . MS (HiRESI) calcd for  $\text{C}_{30}\text{H}_{38}\text{F}_6\text{N}_{14}\text{O}_4\text{PRu}$  905.1894 ( $\text{M}-\text{PF}_6$ ) $^+$ ; found 905.1953. Anal. Calcd for  $\text{C}_{30}\text{H}_{38}\text{F}_{12}\text{N}_{14}\text{O}_4\text{P}_2\text{Ru}$ : C, 34.33; H, 3.65; N, 18.68. Found: C, 34.42; H, 3.62; N, 18.72.

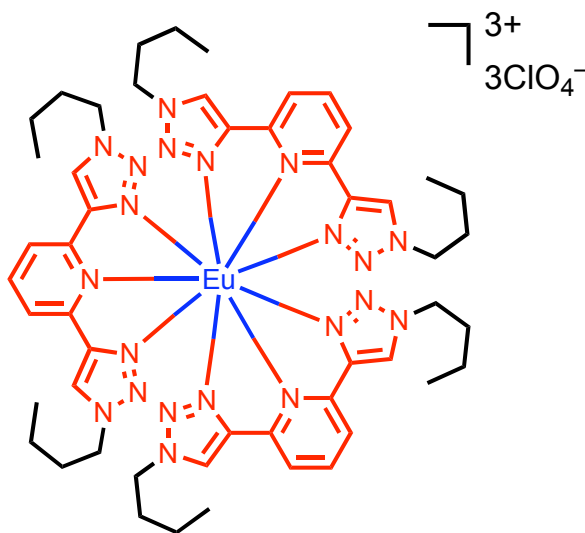

**$[\text{Eu}(\mathbf{2})_3] \cdot 3\text{ClO}_4$ :** To a refluxing solution of **2** (0.154 mmol, 50 mg) in EtOH (3 mL) a solution of  $\text{Eu}(\text{ClO}_4)_3 \cdot n\text{H}_2\text{O}$  (0.05 mol, 27.8 mg) in EtOH (2 mL) was added slowly. Reflux was maintained for 3 h, whereupon the reaction mixture was allowed to cool to room temperature to obtain a precipitate. The precipitate was filtrated and washed with cold EtOH and dried under vacuum to afford  $[\text{Eu}(\mathbf{2})_3] \cdot 3\text{ClO}_4$  (38.5 mg, 54%).  $^1\text{H}$  NMR ( $\text{CD}_3\text{COCD}_3$ , 400 MHz),  $\delta$  = 7.20 (s, 6H), 6.41 (t, 3H,  $J$  = 8.0 Hz), 4.73 (d, 6H,  $J$  = 7.6 Hz), 4.71~4.64 (m, 6H), 4.51~4.40 (m, 6H), 1.80~1.64 (m, 12H), 1.10~1.04 (m, 12H), 0.85 (t, 18H,  $J$  = 7.6 Hz).  $^{13}\text{C}$  NMR ( $\text{CD}_3\text{CN}$ , 100 MHz),  $\delta$  = 160.4, 151.8, 136.8, 103.3, 88.6, 50.4, 33.8, 19.6, 13.6. IR (KBr)  $\nu$  = 3107, 2955, 2928, 2874, 1619, 1588, 1569, 1464, 1250, 1203, 1095, 1029, 815, 621  $\text{cm}^{-1}$ . MS (HiResESI) calcd for  $\text{C}_{51}\text{H}_{69}\text{ClEuN}_{21}\text{O}_4$  ( $\text{M}-2\text{ClO}_4$ ) $^{2+}$  613.7364; found 613.7423. Anal. Calcd for  $\text{C}_{51}\text{H}_{69}\text{Cl}_3\text{EuN}_{21}\text{O}_{12}$ : C, 42.94; H, 4.88; N, 20.62. Found: C, 42.86; H, 4.67; N, 20.64.

## S.2. CRYSTAL STRUCTURE ANALYSIS

The crystal structures of the Ru<sup>II</sup> and Fe<sup>II</sup> complexes are similar to those previously reported.<sup>8</sup> The crystal structure of [Ru(**1**)<sub>2</sub>]•2PF<sub>6</sub> displays a greater degree of distortion away from the ideal octahedral geometry<sup>8</sup> than [Fe(**1**)<sub>2</sub>]•2PF<sub>6</sub>. Based upon the bond distances and angles around the metal center (Figure S2), the Ru<sup>II</sup> complex has a local symmetry of C<sub>1</sub>, whereas it is C<sub>2</sub> for the Fe<sup>II</sup> complex. For Fe<sup>II</sup>, the M–N<sub>py</sub> bonds are equal (1.922 Å), the M–N<sub>tri</sub> bond lengths are grouped into pairs at 1.948 or 1.939 Å as are the N<sub>tri</sub>–Fe–N<sub>py</sub> angles at 81° and 80°, and, the inter-ligand N<sub>py</sub>–Fe–N<sub>py</sub> is one degree away from linearity at 179°. Contrast this with the structure from Ru<sup>II</sup>. In this case, all six Ru–N bonds are different lengths, although the central ones to the pyridines come close to being equivalent at 2.018(2) and 2.015(2) Å each. Admittedly there is a long and short Fe–N<sub>tri</sub> bond for each of the coordinated ligands but the pair of long (2.076(2) and 2.063(2) Å) and short bonds (2.044(2) and 2.039(2) Å) do differ. However, the symmetry of the N<sub>tri</sub>–Fe–N<sub>py</sub> bond angles seen in the Fe<sup>II</sup> complex is retained with a pair of angles at either 78° or 79°. The inter-ligand angle differs from linearity by a greater amount in the Ru<sup>II</sup> complex at 175°. This distortion is believed to arise from the interplay between two types crystal-packing forces – increased steric freedom surrounding the metal-ligand environment when using triazole rings in the coordination sphere and intermolecular hydrogen bonding O–H•••O of terminal hydroxyl functionalities of the propanol arms.

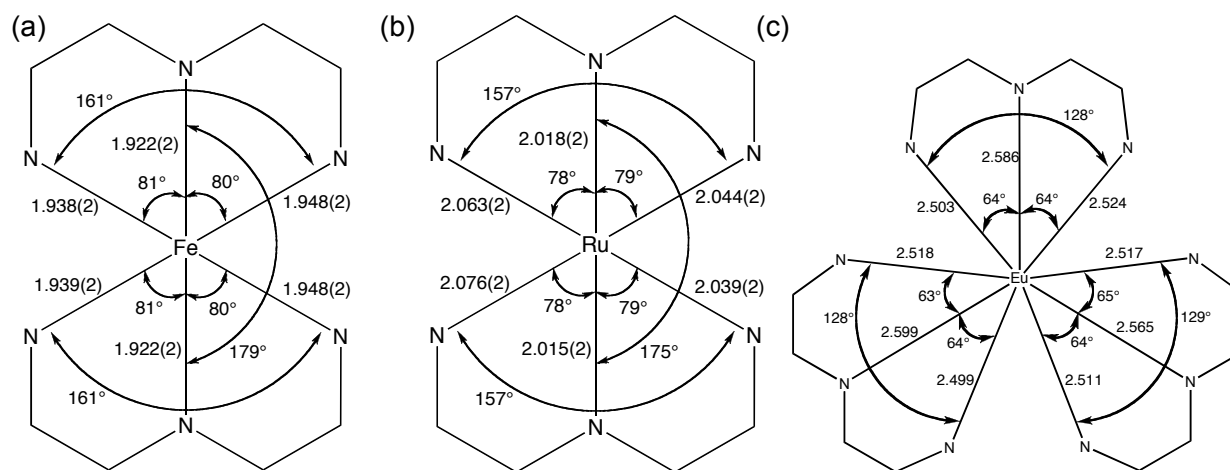

**Figure S2.** Distances and angles within the coordination environment of (a) [Fe(**1**)<sub>2</sub>]•2PF<sub>6</sub>, (b) [Ru(**1**)<sub>2</sub>]•2PF<sub>6</sub> and (c) [Eu(**2**)<sub>3</sub>]•3ClO<sub>4</sub>.

Intermolecular  $\pi$ - $\pi$  stacking is also present in similar degrees for the  $\text{Ru}^{\text{II}}$  and  $\text{Fe}^{\text{II}}$  crystal structures. The  $\pi$ - $\pi$  stacking is observed between the central pyridine ring systems  $\sim 3.3$  Å on adjacent pairs of complexes (Figure S3) in the form of ring-over-bond overlap. The open sterics provided by the triazole N2' nitrogens plays a role here by allowing for the close approach of the H4 proton of the pyridine to the neighboring molecule thereby facilitating the chance for ideal  $\pi$  overlap.

In the case of  $\text{Ru}^{\text{II}}$ , the expanded metal ion,  $d(\text{Ru}-\text{N}_{\text{py}}) = 2.051$  Å;  $d(\text{Fe}-\text{N}_{\text{py}}) = 1.922$  Å, increases the space and therefore capacity for distortion about the metal center. When this feature is coupled with the presence of hydrogen bonding, a more distorted octahedral geometry is observed. In the crystal structure of  $[\text{Ru}(\mathbf{1})_2] \cdot 2\text{PF}_6$ , every hydroxyl group participates in an *infinite* chain<sup>9</sup> (Figure S3) that passes from one end of the crystal to the other. This hydrogen bonding results from  $\sigma$ -bond cooperativity in which the O-H...O bond angles are close to linear thereby defining directional two-center bonds.<sup>10</sup> Inspecting the alternative long-short Ru-N<sub>tri</sub> bond lengths, a few observations are worth noting. The two short bonds are both located on the triazole rings wherein the hydroxyl of the attached propanol arms are bonded to each other via a hydroxyl bridge provided by an adjacent molecule in the crystal structure. Of the two long bonds, one of them connects to the hydroxyl that serves as the aforementioned bridge for a different neighboring molecule. The final long bond extends to a hydroxyl group that serves to inter-molecular bridge between the hydroxyl units of two other molecules. The crystal structure of  $[\text{Fe}(\mathbf{1})_2] \cdot 2\text{PF}_6$  also displays a hydrogen bond network that involves a disordered  $\text{H}_2\text{O}$  molecule and  $\text{PF}_6^-$  anion.

When all these features are considered together, the reduced steric constraints provided by the N2' nitrogen together with the expanded  $\text{Ru}^{\text{II}}$  ion both facilitate greater distortion from octahedral symmetry arising from the extensive hydrogen bonding throughout the crystal. This finding reinforces the impact that the two triazole ring systems incorporated into the tripy ligand structures have on the resulting solid-state structures.

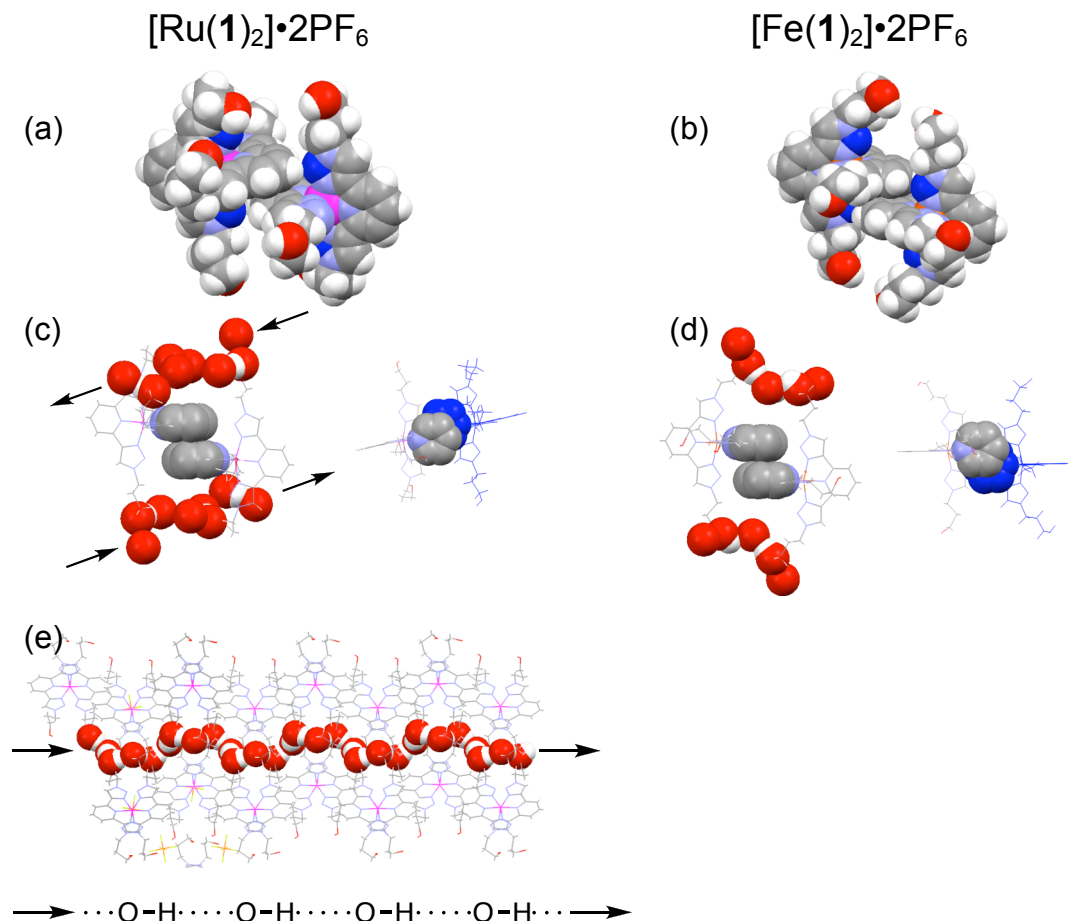

**Figure S3.** Representations of dimers present in the (a)  $[\text{Ru}(\mathbf{1})_2] \cdot 2\text{PF}_6$  and (b)  $[\text{Fe}(\mathbf{1})_2] \cdot 2\text{PF}_6$  crystal structures highlighting the N2' nitrogen of the triazole rings (dark blue) and its effect on intermolecular  $\pi$ - $\pi$  stacking; representations of dimers of (c)  $[\text{Ru}(\mathbf{1})_2] \cdot 2\text{PF}_6$  and (d)  $[\text{Fe}(\mathbf{1})_2] \cdot 2\text{PF}_6$  show the combination of  $\pi$ - $\pi$  stacking and hydrogen bonding; extended representation of (e)  $[\text{Ru}(\mathbf{1})_2] \cdot 2\text{PF}_6$  highlighting the infinite chain of directional two center hydrogen bonds that runs throughout the entire crystal (space-filling, O-H...O angles spread from  $154^\circ$  to  $174^\circ$  and O...O distances average at  $2.819 \text{ \AA}$ ).

### S.3. $^1\text{H}$ NMR SPECTROSCOPY

The  $^1\text{H}$  NMR spectroscopy was recorded to investigate the effect of coordination on ligand proton resonances. In all cases, the H5' proton of the triazole units is the most downfield of the ligands **1** and **2** (Figures S4 and S5) and of the complexes, followed by the H3,5 and H4 protons

on the pyridine ring. For the  $[\text{Fe}(\mathbf{1})_2]\cdot 2\text{PF}_6$ ,  $[\text{Ru}(\mathbf{1})_2]\cdot 2\text{PF}_6$  and  $[\text{Fe}(\mathbf{2})_2]\cdot 2\text{PF}_6$  complexes (Figures S6, S7 and S8), the H5', H3,5 and H4 resonances all shift downfield by about 0.6 ppm, and this is attributed to the induced charge,  $\pi$ -cloud perturbation and the conformational changes that occur as a consequence of coordination. Furthermore, the  $-\text{OH}$  hydroxyl protons are observed in the spectra of the ligand **2** as a singlet at  $\sim 3.9$  ppm and also for the complexes  $[\text{Fe}(\mathbf{1})_2]\cdot 2\text{PF}_6$  and  $[\text{Fe}(\mathbf{1})_2]\cdot 2\text{PF}_6$ , modestly shifted upfield by  $\sim 0.1$  ppm. In each case, the integrated intensity is  $\sim 75\%$  of what it should be, presumably due to  $^2\text{D}$  exchange with solvent.

The  $^1\text{H}$  NMR spectrum of  $[\text{Eu}(\mathbf{2})_3]^{3+}$  (Figure S9), displays one set of peaks consistent with one dominant species in solution. The H3,5 protons on the pyridine display the greatest lanthanide induced shift (LIS) of  $\sim 3.2$  ppm upfield, whereas, the pyridine H4 proton and the triazole H5' protons shift upfield by  $\sim 1.5$  ppm. The protons on the butyl chain in the methyl, H3" and H2" positions display modest shifts, whereas the H1" proton is split evenly into two 1:1 multiplet resonances labeled H1"<sub>A</sub> and H1"<sub>B</sub> at 4.66 and 4.45 ppm, respectively. In the case of H1"<sub>A</sub>, the resonance is close to that for the H3,5 protons. This splitting is not observed for **1** or **2**, neither for  $[\text{Fe}(\mathbf{1})_2]^{2+}$ ,  $[\text{Fe}(\mathbf{2})_2]^{2+}$  nor  $[\text{Ru}(\mathbf{1})_2]^{2+}$ . The crystal structure for this compound shows that five of the six methylene units corresponding to H1" protons are oriented in the same way. For this major conformation, the H1" protons are either directed towards or away from the  $\text{Eu}^{\text{III}}$  center. This observation implies that a through-space LIS distinguishes between both H1" protons and that the two proton environments are exchanging slowly on the  $^1\text{H}$  NMR timescale.

The presence of just one form of  $[\text{Eu}(\mathbf{2})_3]^{3+}$  in solution is in stark contrast with the analogous  $[\text{Eu}(\text{terpy})_3]^{3+}$  complex in  $\text{CD}_3\text{CN}$ , which exists in three different forms that are best described<sup>11</sup> by a stability ordering with respect to the coordination number: 8-coordinate > 9-coordinate >> 7-coordinate. This difference to the tris-terpy complex arises from the exchange of the terminal pyridine units in terpy for the triazole rings in tripy. This replacement effectively removes the C–H protons  $\alpha$  to the coordinating nitrogen on the terminal pyridine units and consequently, removes their destabilizing steric interaction with an adjacent terpy ligand. This interaction is readily seen in the distortion<sup>8</sup> of  $[\text{Eu}(\text{terpy})_3]^{3+}$  from  $D_3$  symmetry to  $C_2$  and the resulting nonplanarity of the terpy ligands to alleviate the C–H proton-to-ligand steric clash.

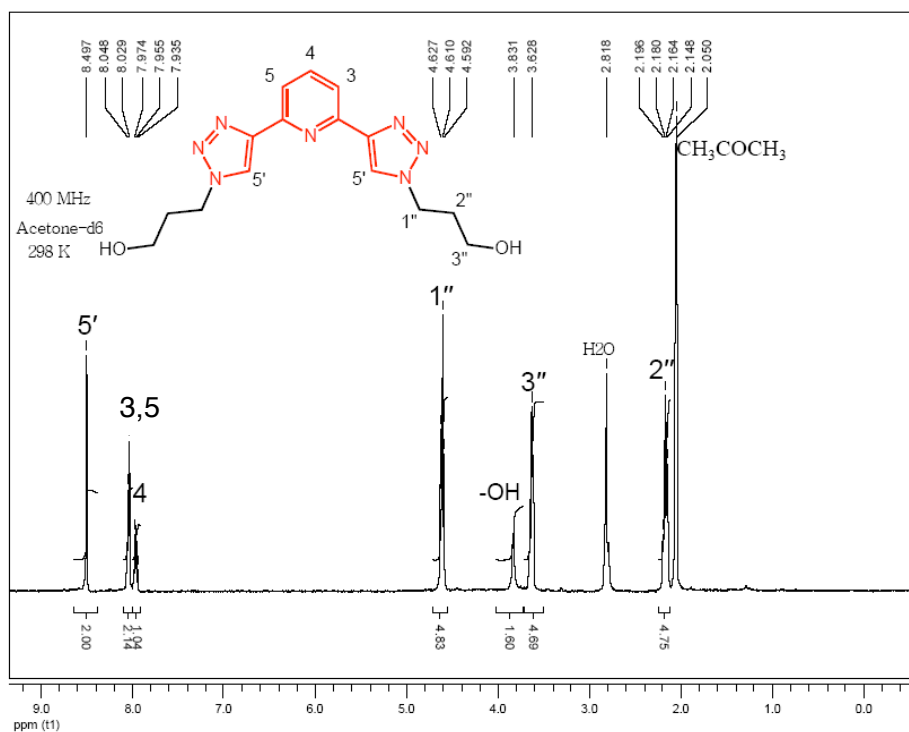

**Figure S4.** Full <sup>1</sup>H NMR spectrum (400 MHz, CD<sub>3</sub>COCD<sub>3</sub>) of **1**.

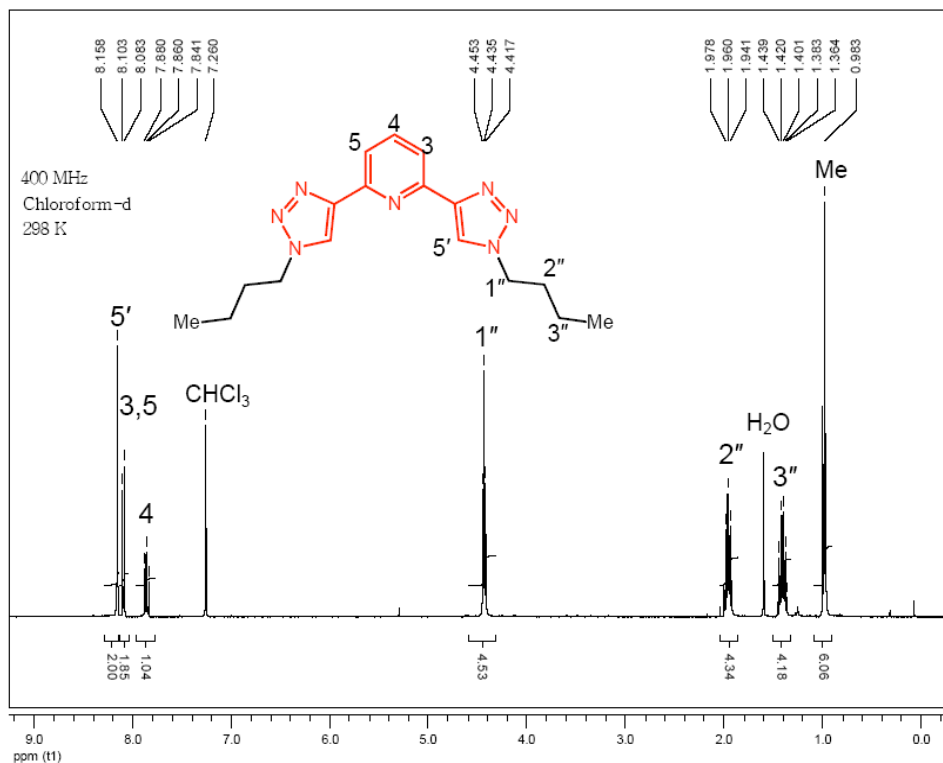

**Figure S5.** Full <sup>1</sup>H NMR spectrum (400 MHz, CDCl<sub>3</sub>) of **2**.

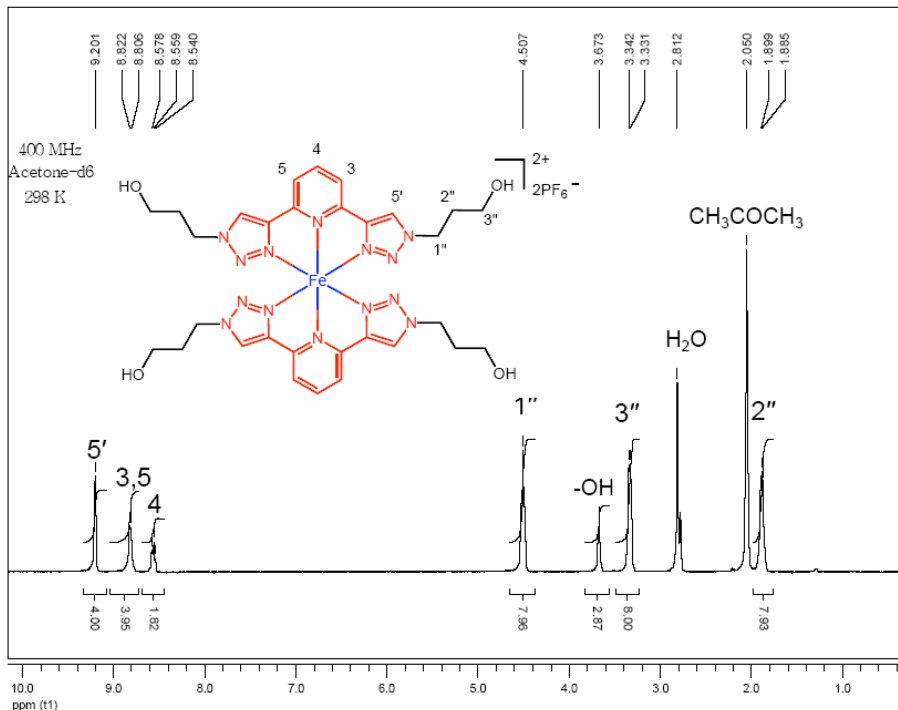

**Figure S6.** Full  $^1\text{H}$  NMR spectrum (400 MHz,  $\text{CD}_3\text{COCD}_3$ ) of  $[\text{Fe}(\mathbf{1})]^{2+}$ .

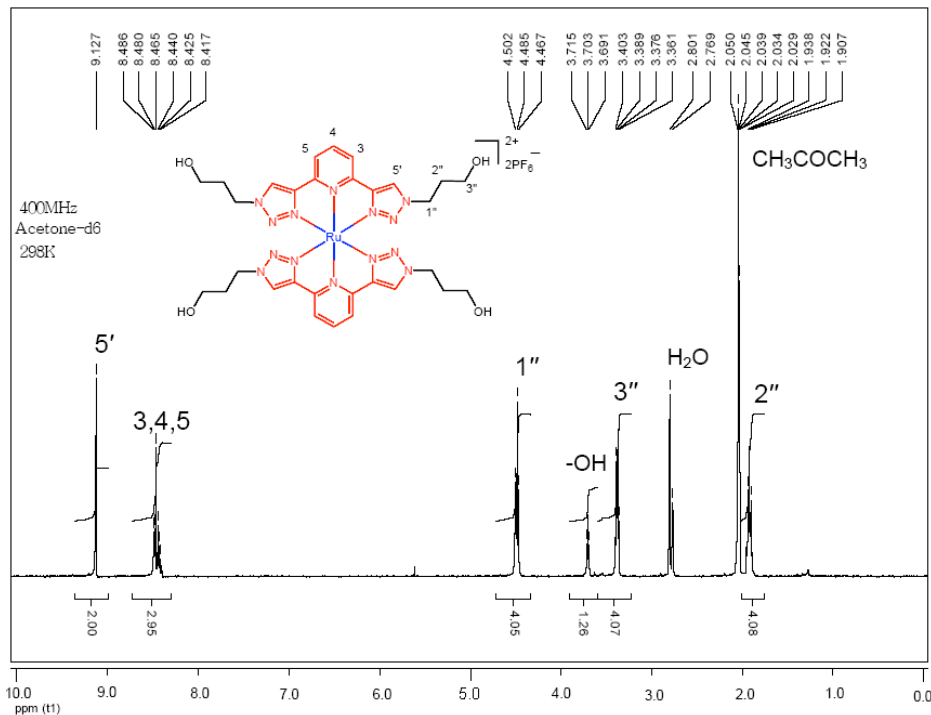

**Figure S7.** Full  $^1\text{H}$  NMR spectrum (400 MHz,  $\text{CD}_3\text{COCD}_3$ ) of  $[\text{Ru}(\mathbf{1})_2]^{2+}$ .

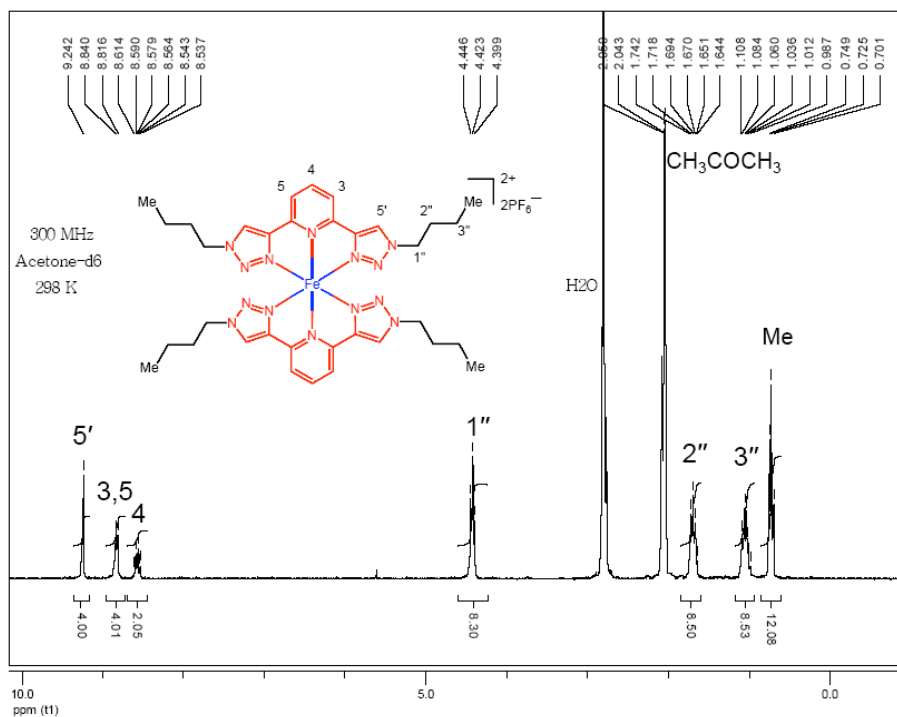

**Figure S8.** Full  $^1\text{H}$  NMR spectrum (300 MHz,  $\text{CD}_3\text{COCD}_3$ ) of  $[\text{Fe}(\mathbf{2})_2]^{2+}$ .

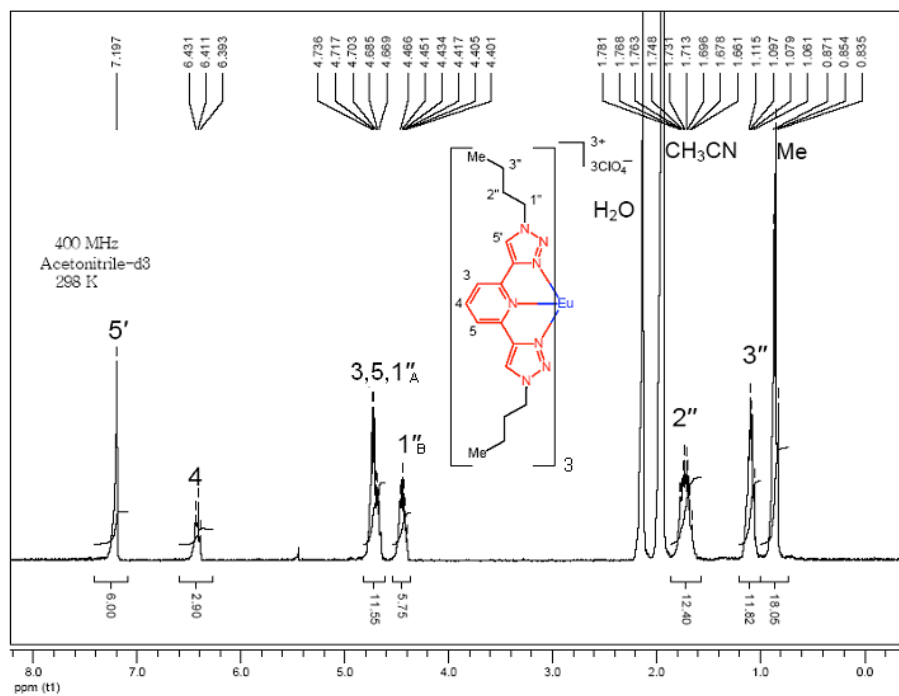

**Figure S9.** Full  $^1\text{H}$  NMR spectrum (400 MHz,  $\text{CD}_3\text{CN}$ ) of  $[\text{Eu}(\mathbf{2})_3]^{3+}$ .



#### **S.4. MOLECULAR MODELING OF THE SOFTENED GEOMETRICAL CONSTRAINTS FOR THE TRIPY CORE MOTIF IN AN OCTAHEDRAL FIELD**

In order to provide more insight into the role that the sterically open N2' nitrogens of the triazole rings play in octahedral iron complexes, a simple molecular model was investigated. The energy associated with deformation around the Fe center was calculated by constraining the inter-ligand angle  $\theta$  (Figure S14a) between the central Fe–N(pyridine) bond of one ligand and the Fe–N(triazole) of the other ligand. The energy was calculated for both bis-tripy and bis-terpy complexes based on tripy and terpy core structures. The counterions of both complexes were omitted and the terminal propanol arms branching out from the tripy core were replaced with methyl groups. For the tripy and terpy complexes, the minimized structures (SPARTAN minimizer) displayed inter-ligand angles of  $\theta = 111.9$  and  $105.5^\circ$ , respectively. This  $6^\circ$  difference reflects the geometrical difference between the 5- or 6-membered ring systems of the terminal triazole or pyridine moieties for tripy or terpy, respectively. Constraints were placed on the inter-ligand angle and the energy minimized subsequently to generate plots (Figure S14b) of deformation energy versus the change in the angular coordinate. The angular coordinate was determined as the relative angle of deformation between the optimized geometry and the constrained one:  $111.9^\circ - \theta$  and  $105.5^\circ - \theta$  for tripy and terpy, respectively. These plots indicate that the use of tripy core effectively halves the energy arising from deformation of the inter-ligand angle when compared with terpy.

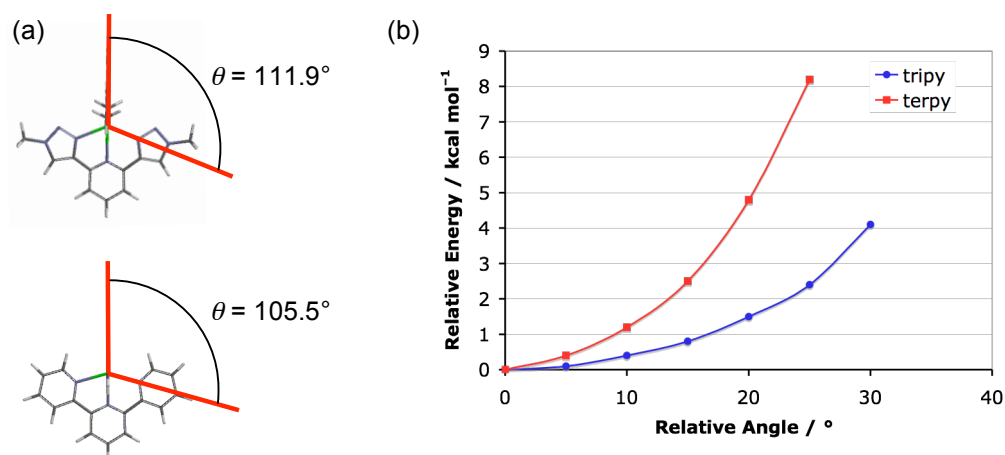

**Figure S10.** Definition of the inter-ligand angle  $\theta$  for a model bis-tripy and bis-terpy iron complex, which is constrained to estimate by (b) the relative deformation energy (SPARTAN minimizer) as a function of relative angle ( $= 111.9^\circ - \theta$  for tripy and  $= 105.5^\circ - \theta$  for terpy)

## S.5. ELECTROCHEMISTRY

A survey of the electrochemistry of the  $\text{Fe}^{\text{II}}$ ,  $\text{Ru}^{\text{II}}$  and  $\text{Eu}^{\text{III}}$  complexes were performed in order to compare and contrast their properties with the terpy complexes. During the course of the CV experiments on  $[\text{Fe}(\mathbf{1})_2]^{2+}$  (Figure S11), a sensitivity to  $\text{H}_2\text{O}$  was observed (Figure S12) following on from inserting the SCE into the solution. Subsequently, the reversible oxidation process at +1.2 V changes to display a scan-rate dependent quasi-reversible behavior. By contrast, addition of  $\text{H}_2\text{O}$  by means of the SCE has no influence on the CV behavior of  $[\text{Fe}(\text{terpy})_2]^{2+}$  and  $[\text{Ru}(\mathbf{1})_2]^{2+}$  complexes (Figure S13a,b). To investigate this relationship further, the methylated version of **1** was used to prepare the complex,  $[\text{Fe}(\mathbf{2})_2] \cdot 2\text{PF}_6$  confirming that the  $\text{Fe}^{\text{III}}$  redox product was not related (Figure S13c) to a coordination mode involving the hydroxyl end groups. Secondly, known amounts of  $\text{H}_2\text{O}$  were added to the CV solution of  $[\text{Fe}(\mathbf{2})_2]^{2+}$  with the concomitant increase in the degree of quasi-reversible behavior (Figure S14). A full discussion of this behavior is presented in the next **Section S.6**.

The quasi-reversible two-electron reduction of  $[\text{Ru}(\mathbf{1})_2]^{2+}$  (Figure S15) assigned to a ligand-localized process was investigated as a function of scan rate. As the scan rate increases, the reduction peak at  $-1.7$  V increases peak intensity and shifts to more negative potentials. However, there are two features in the return sweep that indicate that the product of reduction is formed at rates faster than those determined by the  $500 \text{ mV s}^{-1}$  scan rate, i.e., faster than  $3 \text{ s}^{-1}$ . The corresponding oxidation peak begins to emerge as a broad signal at  $-1.2$  V and the oxidation of the reduction product shifts to more negative potentials from  $+0.6$  to  $+0.4$  V. It was found that consecutive CV cycles were identical.

For  $[\text{Eu}(\mathbf{2})_3]^{3+}$ , the CV shows (Figure S16) quasi reversible behaviour for the reduction of  $\text{Eu}^{\text{III}}$  ( $-0.66$  V). In the anodic region, the first oxidation wave, assigned to the coordinated ligand **2**, is highly irreversible. For this reason, only the peak potentials for the forward scans are reported in Table S2. The difference in potential between the  $\text{Eu}^{\text{III/II}}$  reduction and oxidation of **2** is comparable to those found for the triple helical complexes with terpy.<sup>12</sup>

The CV of the free ligand, **2**, (Figure S17) displays an irreversible reduction at  $-2.5$  V and oxidation at  $+1.9$  V. Upon coordination to  $\text{Fe}^{\text{II}}$ , the reduction is stabilized by  $\sim 800$  mV. The same can be said for coordination to  $\text{Ru}^{\text{II}}$  even although the reduction is quasi-reversible. This observation is consistent with the stabilization of the ligand LUMO due to coordination to the electropositive metal centers.

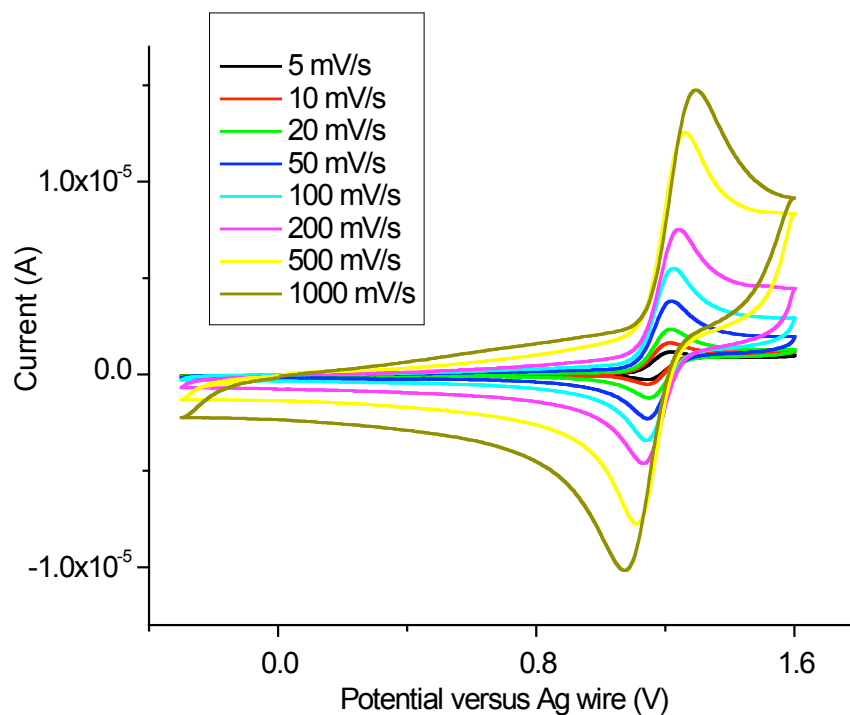

**Figure S11.** CV for  $[\text{Fe}(\mathbf{1})_2]^{2+}$  at different scan rates (1.4 mM, MeCN, 0.1 M TBAPF<sub>6</sub>).

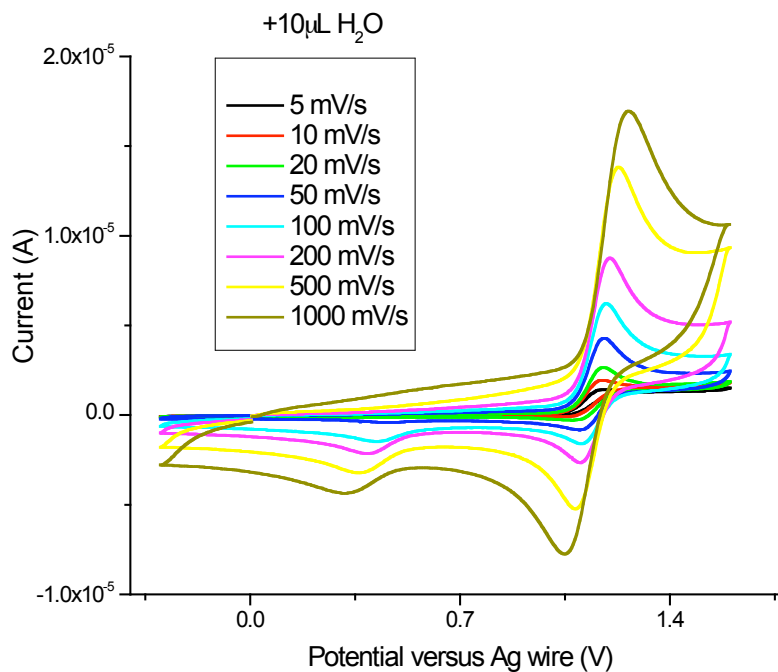

**Figure S12.** CV of  $[\text{Fe}(\mathbf{1})_2]^{2+}$  in the presence of 10  $\mu\text{L}$  of H<sub>2</sub>O at different scan rates (1.2 mM, MeCN, 0.1 M TBAPF<sub>6</sub>).

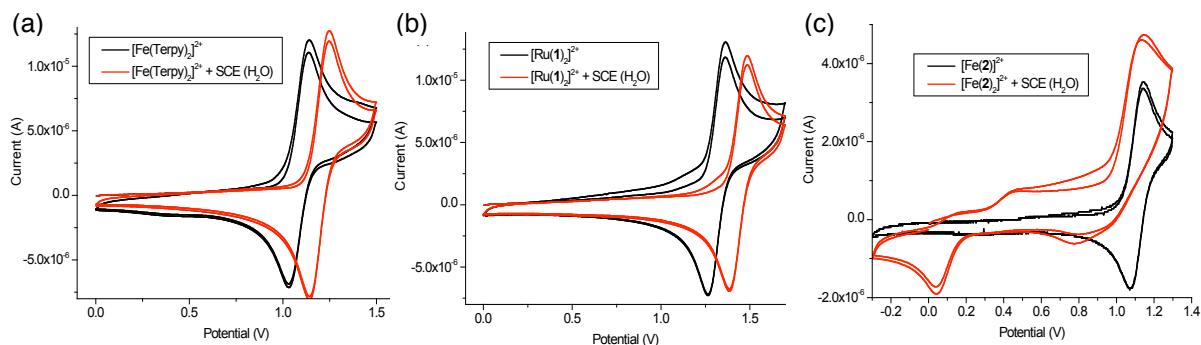

**Figure S13.** CV ( $\nu = 200 \text{ mV s}^{-1}$ ) of  $[\text{Fe}(\mathbf{2})_2]^{2+}$ ,  $[\text{Fe}(\text{terpy})_2]^{2+}$  and  $[\text{Ru}(\mathbf{1})_2]^{2+}$  after the addition of  $\text{H}_2\text{O}$  in the form of the SCE reference electrode ( $\text{MeCN}$ ,  $0.1 \text{ M TBAPF}_6$ ). Black trace: Ag wire reference electrode; red trace: SCE reference electrode.

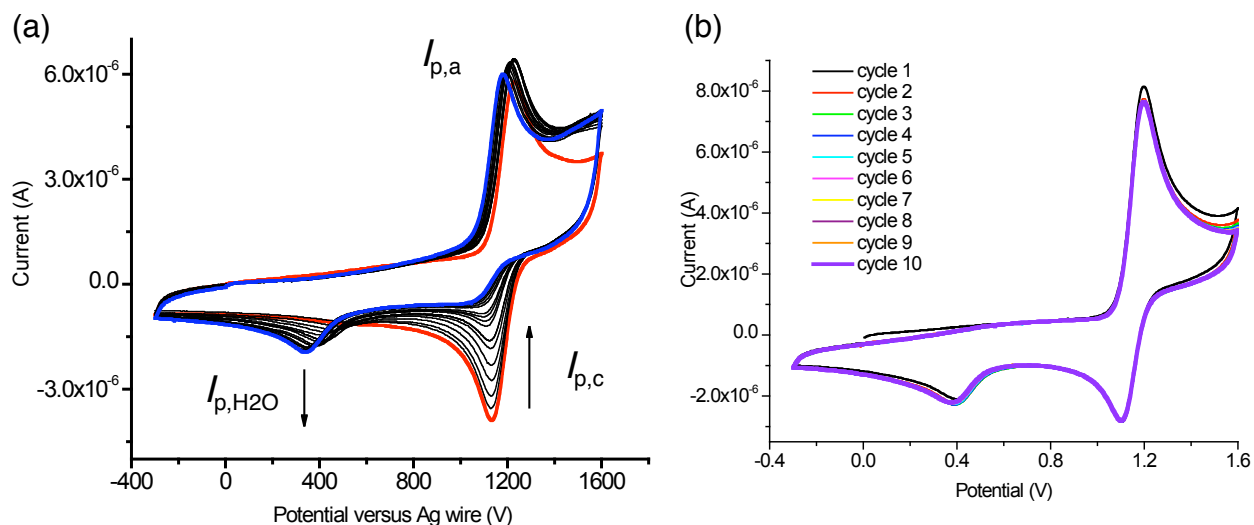

**Figure S14.** (a) CV of  $[\text{Fe}(\mathbf{1})_2]^{2+}$  ( $\nu = 200 \text{ mV s}^{-1}$ ,  $1.3 \text{ mmol}$ ) in anhydrous  $\text{MeCN}$  (red trace) and upon the addition of 1, 2, 3, 4, 5, 6, 7, 8, 9, 10, 11, 14, 16, 18, 20, 22, 25 (blue trace)  $\mu\text{L}$  of  $\text{H}_2\text{O}$  ( $\text{MeCN}$ ,  $0.1 \text{ M TBAPF}_6$ ). (b) CV of  $[\text{Fe}(\mathbf{1})_2]^{2+}$  ( $\nu = 200 \text{ mV s}^{-1}$ ,  $1.3 \text{ mmol}$ ) with  $10 \mu\text{L}$  of  $\text{H}_2\text{O}$  ( $\text{MeCN}$ ,  $0.1 \text{ M TBAPF}_6$ ), during 10 consecutive cycles.

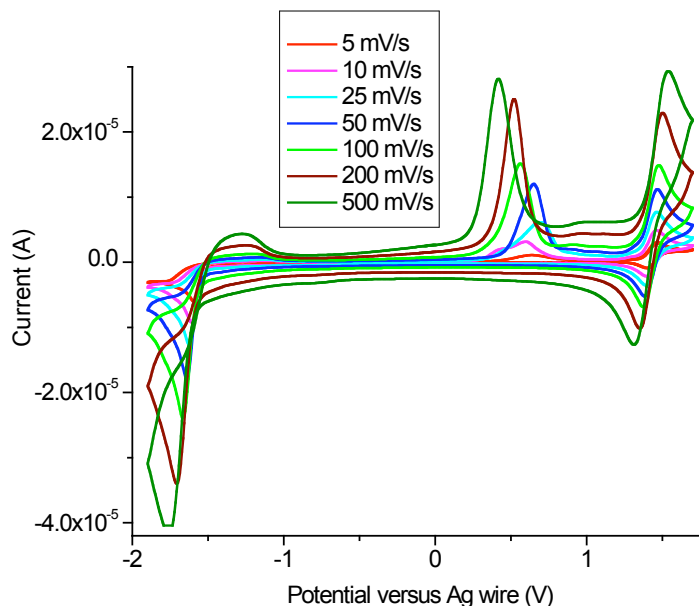

**Figure S15.** CV of  $[\text{Ru}(\mathbf{1})_2]^{2+}$  at different scan rates (1.3 mM, MeCN, 0.1 M TBAPF<sub>6</sub>).

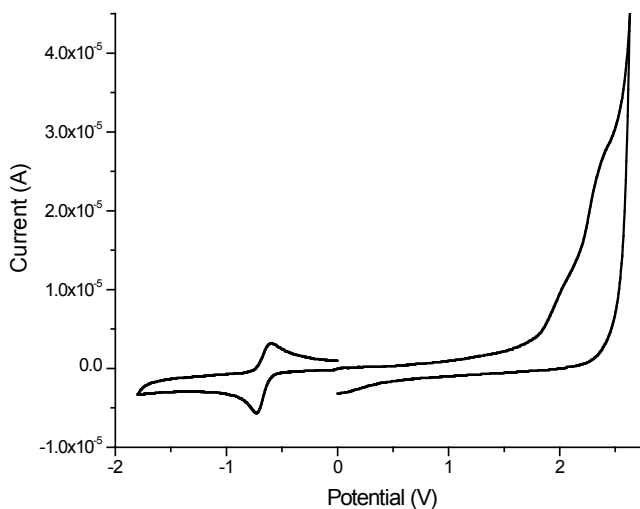

**Figure S16.** CV of  $[\text{Eu}(\mathbf{2})_3]^{3+}$  ( $\nu = 200 \text{ mV s}^{-1}$ , 1.1 mM, MeCN, 0.1 M TBAPF<sub>6</sub>). Ag wire as reference electrode and corrected to SCE electrode.

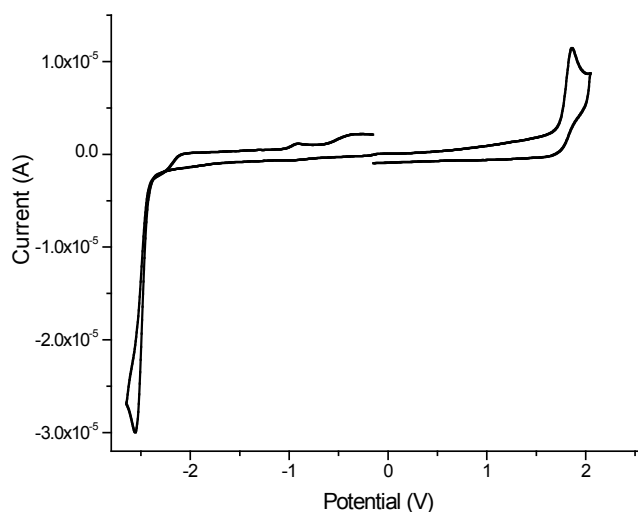

**Figure S17.** CV of **2** (200 mV s<sup>-1</sup>, 1.5 mM, MeCN, 0.1 M TBAPF<sub>6</sub>). Ag wire as reference electrode and corrected to SCE electrode.

**Table S2.** Comparison of CV and UV-Vis Spectroscopic Data<sup>a</sup>

|                                              | $E_{1/2}(\text{Ox})$<br>V           | $E_{1/2}(\text{Red1})$<br>V | $E_{1/2}(\text{Red2})$<br>V | $\lambda_{\text{max}}(\epsilon_{\text{max}})^c$<br>nm ( $\times 10^5 \text{ M}^{-1} \text{ cm}^{-1}$ ) | $\Delta E(\text{redox})^d$<br>V | $E_{\text{MLCT}}$<br>eV <sup>e</sup> |
|----------------------------------------------|-------------------------------------|-----------------------------|-----------------------------|--------------------------------------------------------------------------------------------------------|---------------------------------|--------------------------------------|
|                                              | Metal                               | Ligand                      | Ligand                      |                                                                                                        |                                 |                                      |
| [Fe(terpy) <sub>2</sub> ] <sup>2+</sup>      | 1.09                                | -1.27                       | -1.43                       | 552 (1.76), 319 (7.65)                                                                                 | 2.36                            | 2.25                                 |
| [Fe( <b>1</b> ) <sub>2</sub> ] <sup>2+</sup> | 1.03                                | -1.53                       | -1.83                       | 442 (1.23), 295 (4.68)                                                                                 | 2.56                            | 2.81                                 |
| [Ru(terpy) <sub>2</sub> ] <sup>2+</sup>      | 1.26                                | -1.28                       | -1.54                       | 475 (1.83), 308 (7.79)                                                                                 | 2.54                            | 2.61                                 |
| [Ru( <b>1</b> ) <sub>2</sub> ] <sup>2+</sup> | 1.32                                | -1.8 <sup>b</sup>           |                             | 394 (1.50), 284 (5.48)                                                                                 | 3.10                            | 3.15                                 |
| <b>2</b>                                     | 1.9 <sup>b</sup>                    | -2.55                       |                             | 301 (1.32)                                                                                             |                                 |                                      |
|                                              | Ligand                              | Metal                       |                             |                                                                                                        |                                 |                                      |
| [Eu( <b>2</b> ) <sub>3</sub> ] <sup>3+</sup> | 2.0 <sup>b</sup> , 2.4 <sup>b</sup> | -0.66                       |                             | 309 (3.87)                                                                                             |                                 |                                      |

<sup>a</sup> Potentials versus SCE,  $\nu = 200 \text{ mV s}^{-1}$ , MeCN, 0.1 M TBAPF<sub>6</sub> <sup>b</sup> peak potential value used from irreversible process <sup>c</sup> MeCN <sup>d</sup>  $\Delta E(\text{redox}) = E_{1/2}(\text{Ox}) - E_{1/2}(\text{Red1})$  <sup>e</sup>  $E_{\text{MLCT}} = ((10^7 \text{ nm} \cdot \text{cm}^{-1}) / \lambda) / 8065 \text{ cm}^{-1} \cdot \text{eV}^{-1}$

## S.6. CHARACTERIZATION OF REDOX-STIMULATED AQUATION OF $[\text{Fe}(\mathbf{1})_2]^{3+}$ USING ELECTROCHEMISTRY

The CV data of  $[\text{Fe}(\mathbf{1})_2]^{2+}$  upon the addition of  $\text{H}_2\text{O}$  (Figure S14) were analyzed based on a model of aquation of the  $\text{Fe}^{\text{III}}$  redox center that can be reversed upon reduction to the  $\text{Fe}^{\text{II}}$  center (Scheme S1) consistent with an EC mechanism. The peak current of the redox waves assigned to each species in solution has been measured as a function of the addition of increasing amounts of  $\text{H}_2\text{O}$ : Oxidation of  $[\text{Fe}(\mathbf{1})_2]^{2+}$  leads to peak current  $I_{\text{p,a}}$ ; reduction of any residual  $[\text{Fe}(\mathbf{1})_2]^{3+}$   $I_{\text{p,c}}$ ; and reduction of the aquation product  $[\text{Fe}(\mathbf{1})(\mathbf{1-N})(\text{OH}_2)]^{3+}$   $I_{\text{p,H}_2\text{O}}$ . Based on the concentration of  $[\text{Fe}(\mathbf{1})_2]^{2+}$  (1.3 mM), this spans the addition of 0 to 1.25 equivalents of  $\text{H}_2\text{O}$ .

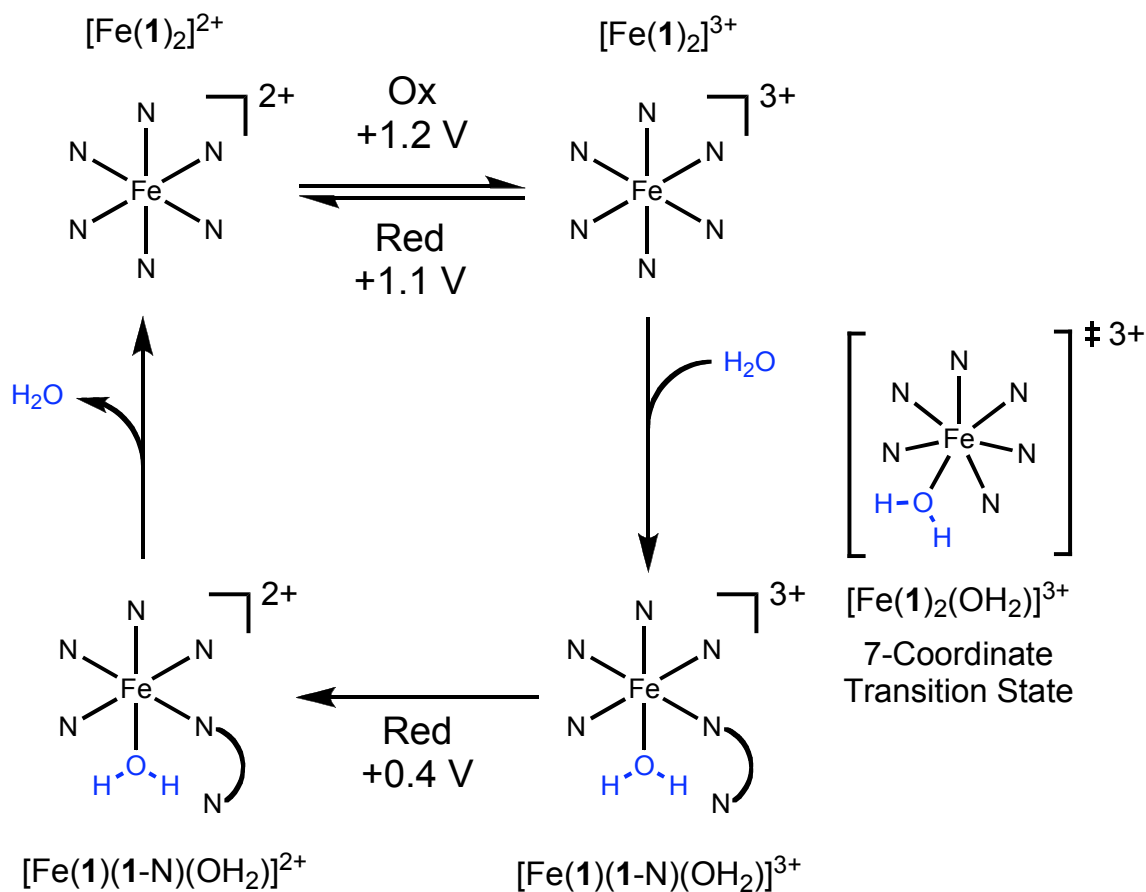

**Scheme S1.** Proposed scheme for the reversible redox-stimulated aquation of  $[\text{Fe}(\mathbf{1})_2]^{2+}$  that goes via a 7-coordinate transition state.



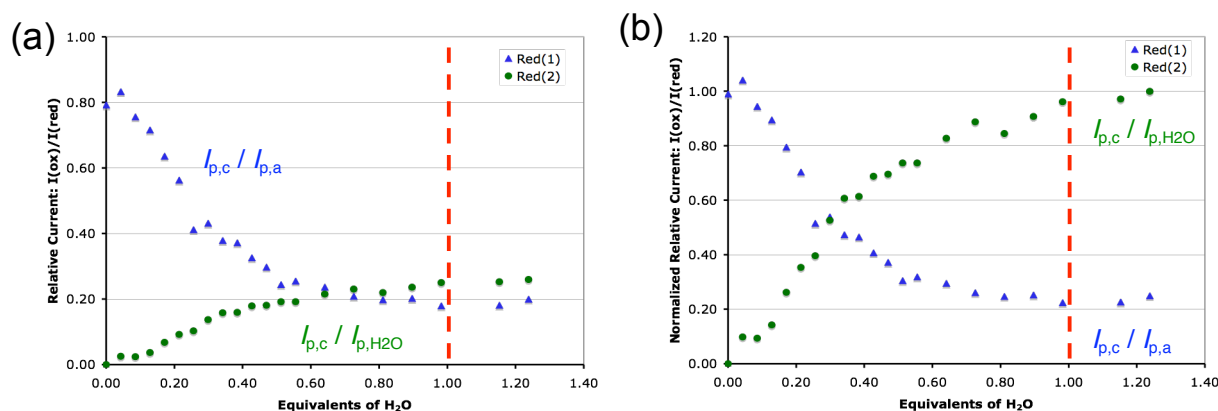

**Figure S18.** Plots of (a) peak current ratios and (b) normalized peak current ratios versus the equivalents of H<sub>2</sub>O added into the solution of [Fe(1)<sub>2</sub>]<sup>2+</sup>.

From the current ratio plots, the decrease in the Fe<sup>III</sup> parent reduction peak ( $I_{p,c}$ ) at +1.1 V correlates with the increase in the aquation product's reduction peak ( $I_{p,H_2O}$ ) at +0.4 V. The peak current ratios (Figure S18a) and related normalized current ratios (Figure S18b) of both reduction processes compared to the oxidation, i.e.,  $I_{p,c} / I_{p,a}$  and  $I_{p,H_2O} / I_{p,a}$ , suggest 1:1 binding between H<sub>2</sub>O and the electrogenerated Fe<sup>III</sup> redox state [Fe(1)<sub>2</sub>]<sup>3+</sup>. However, the peak current is only 25% of the value expected assuming there is 100% conversion to the aquation product after addition of 1 equivalent of H<sub>2</sub>O. Changing the scan rate (Table S3) did not influence the current peak ratios for either reduction process in a systematic manner. Inspection of the second consecutive CV cycle, for any of the scan rates probed (5 – 1000 mV s<sup>-1</sup>), shows that it is coincident with the first cycle. This observation alone provides compelling evidence that the *entire* process is fully reversible and that the lower than expected current values for the cathodic peak at +0.4 is associated with either (1) a slower rate of heterogeneous electron transfer, or (2) smaller diffusion constant for the Fe<sup>III</sup> aquation product, than for [Fe(1)<sub>2</sub>]<sup>3+</sup>. The CV data (Table S3) suggest a product is formed faster than the time between oxidation to the Fe<sup>III</sup> state and its reduction at +1.1 V.

**Table S3.** Peak current ratios for reduction processes compared to the primary oxidation in anhydrous MeCN and with the addition of H<sub>2</sub>O<sup>a</sup>

| Scan rate / mV s <sup>-1</sup> | Anhydrous MeCN      | +10 $\mu$ L H <sub>2</sub> O |                        |
|--------------------------------|---------------------|------------------------------|------------------------|
|                                | $I_{p,c} / I_{p,a}$ | $I_{p,c} / I_{p,a}$          | $I_{p,H_2O} / I_{p,a}$ |
| 5                              | 0.98                | 0.88                         | <sup>b</sup>           |
| 10                             | 0.98                | 0.81                         | <sup>b</sup>           |
| 20                             | 0.95                | 0.66                         | 0.02                   |
| 50                             | 0.91                | 0.51                         | 0.07                   |
| 100                            | 0.89                | 0.44                         | 0.32                   |
| 200                            | 0.84                | 0.49                         | 0.30                   |
| 500                            | 0.99                | 0.56                         | 0.22                   |
| 1000                           | 0.85                | 0.62                         | 0.17                   |
| 2000                           | -                   | 0.54                         | 0.13                   |

<sup>a</sup> All data obtained from CV studies (0.1 M TBAPF<sub>6</sub>, Ag wire pseudo reference electrode) for anhydrous MeCN (sample ~ 1.4 mM) and with 10 mL of H<sub>2</sub>O (sample ~ 1.2 mM). <sup>b</sup> No peak intensity was observed for these scan rates.

Information about the aquated product can be inferred from an examination of the CVs, a survey of the known crystal structures of related compounds as a measure of prevalence for certain coordination motifs as well as the shallow potential energy surface for deformation of the inter-ligand angle,  $\theta$  about the Fe center (**Section S.4**). Comparison of the CVs of [Fe(**1**)<sub>2</sub>]<sup>2+</sup> and [Ru(**1**)<sub>2</sub>]<sup>2+</sup>, show that only the iron complex displayed a facile susceptibility to H<sub>2</sub>O. This observation correlates well with the presence of more than 12 *aquated* and *heptacoordinate* Fe<sup>II</sup> or Fe<sup>III</sup> complexes<sup>13</sup> and the paucity of any form of heptacoordinate Ru<sup>III</sup> complexes. For the iron complexes, most of them incorporate multidentate ligands, for example, the hexadentate ethylenediaminetetraacetate tetraanion (EDTA), incorporating both N and O atom donors. These crystal structures show a H<sub>2</sub>O molecule coordinated in a reasonably open looking pocket provided by the other ligand(s). By contrast, seven-coordinate complexes of ruthenium, in any oxidation state, occur with hydrides or unsaturated ligands,<sup>14</sup> even although the hexacoordinate mono-aquated Ru<sup>II</sup> complexes can be made routinely.<sup>15</sup> This literature survey correlates well with the susceptibility of the [Fe(**1**)<sub>2</sub>]<sup>3+/2+</sup> oxidation towards H<sub>2</sub>O. This information suggests that the electrogenerated Fe<sup>III</sup> center can accommodate H<sub>2</sub>O in a seventh coordination site when there is sufficient room to do so, either transiently, or as a stable compound. This pathway is blocked for

the  $[\text{Fe}(\text{terpy})_2]^{2+}$  complex with the steric protection provided by the proximal C–H proton. This pathway is likely to be rarer for Ru complexes, presumably on account of electronic factors rather than steric ones.

Regarding the nature of the aquated product, the electrochemistry and some molecular modeling (SPARTAN minimizer) helps to provide insight into the electronic and steric environment surrounding the  $\text{Fe}^{\text{III}}$  center, respectively. There is a significant 800 mV shift between the reduction of the  $\text{Fe}^{\text{III}}$  parent complex  $[\text{Fe}(\mathbf{1})_2]^{3+}$  at +1.1 V and the aquation product +0.4 V. This shift can be related to smaller shifts in the same direction observed for 6-coordinate environments between compounds with and without one N-donor ligand replaced for  $\text{H}_2\text{O}$ . For example, the oxidation couple for  $[\text{Ru}(\text{bpy})_3]^{3+/2+}$  is 1.02 V vs SCE,<sup>16</sup> whereas the related complex,  $[\text{Ru}(\text{bpy})_2(\text{py})(\text{OH}_2)]^{3+/2+}$  is at 0.78 V vs SCE<sup>15a</sup> (bpy = 2,2'-bipyridine; py = pyridine) consistent with a stabilization of 240 mV; similarly, the oxidation of *trans*- $[\text{RuCl}(\text{cyclam})(\text{py})]^{2+/+}$  is at +0.32 vs NHE, whereas for *trans*- $[\text{RuCl}(\text{OH}_2)(\text{cyclam})]^{2+/+}$  it lies at 0.012 V vs NHE (cyclam = 1,4,8,11-tetraazacyclotetradecane) relating into a stabilization of 310 mV.<sup>17</sup> These examples are consistent with the results obtained here that, the replacement of an N-donor ligand by  $\text{H}_2\text{O}$  stabilizes the  $\text{Fe}^{\text{III/II}}$  redox potential. The magnitude of the shift for  $[\text{Fe}(\mathbf{1})_2]^{3+/2+}$  is, however, significantly larger. This ~500 mV discrepancy suggests that a 7-coordinate species with its additional N-donor atom might be the aquation product.

To investigate the viability of a 7-coordinate bis-tripy complex of iron, a molecular mechanics study was conducted and the results compared to the bis-terpy analog. For this purpose, monoaquated 7-coordinate bis-tripy and bis-terpy Fe complexes were constructed and their geometries optimized (Figure S19). In order to accommodate the single  $\text{H}_2\text{O}$  molecule, the inter-ligand angle,  $\theta$ , in tripy was found to decrease from ~112° to ~86° and for terpy from ~106° to ~97° corresponding to a reduction of 26° and 9°, respectively. Even although this coordinate is not the sole one responsible for minimizing the molecular mechanics energy in this simulation, its large change in the tripy complex suggests that a greater amount of the geometrical requirements for aquation can be mediated by a reduction in the inter-ligand angle for the complexes with tripy than for terpy.

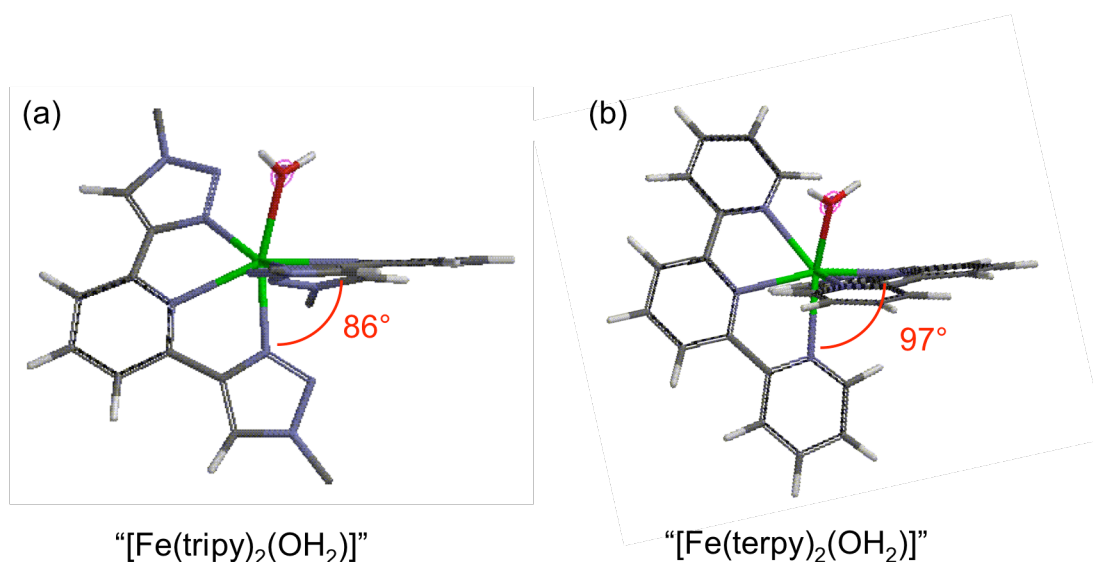

**Figure S19.** Geometry optimized structures (SPARTAN minimizer) of model 7-coordinate iron complexes of tripy and terpy.

In summary, the influence of  $\text{H}_2\text{O}$  on the CV of  $[\text{Fe}(\mathbf{1})_2]^{2+}$  is attributed to a molecular event involving the coordination of  $\text{H}_2\text{O}$  to either produce a not uncommon 7-coordinate  $\text{Fe}^{\text{III}}$  complex,  $[\text{Fe}(\mathbf{1})_2(\text{OH}_2)]^{3+}$ , or to go through a hepta-coordinate species heading to a 6-coordinate product,  $[\text{Fe}(\mathbf{1})(\mathbf{1}-\text{N})(\text{OH}_2)]^{3+}$ . This effect, therefore, is facilitated by the more exposed iron center when the more open triazole ring systems are employed.

## S.7. EMISSION SPECTROSCOPY

In MeCN solution, ligands **1** and **2** are fluorescent (Figure S20), the complex  $[\text{Eu}(\mathbf{2})_3]^{3+}$  displays mixed emission<sup>12b</sup> (Figures S21 and S22) in the form of phosphorescence from the  $\text{Eu}^{\text{III}}$  center and fluorescence from **2**, whereas none of the  $\text{Fe}^{\text{II}}$  or  $\text{Ru}^{\text{II}}$  complexes displayed any emission properties in the conditions investigated. Both ligands display the same emission ( $\lambda_{\text{max}} = 337 \text{ nm}$ ) and excitation ( $\lambda_{\text{max}} = 300$  and  $238 \text{ nm}$ ) maxima consistent with the same emissive core. The emissive state is sensitized at the same wavelengths of maximum of absorption of the ligand (Figure S23). The phosphorescence of the  $\text{Eu}^{\text{III}}$  center displays two characteristic and sharp bands at 592 and 616 nm that display maximum excitation at 274 and 337 nm. In addition, the relative contribution of fluorescence from the ligand **2** to the emission spectra of  $[\text{Eu}(\mathbf{2})_3]^{3+}$  increases

compared to  $\text{Eu}^{\text{III}}$  phosphorescence with dilution from 200 to 50  $\mu\text{M}$ , consistent with ligand disassociation at these concentrations.

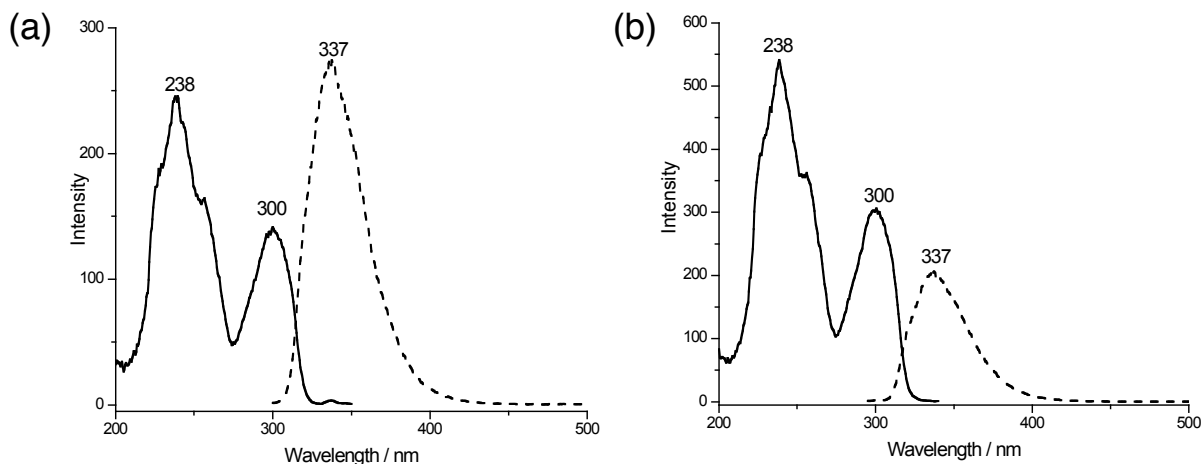

**Figure S20.** Emission (dashed line) and excitation (solid line) spectra of (a) **1** (4.86  $\mu\text{M}$ ,  $\text{CH}_3\text{CN}$ ,  $\lambda_{\text{exc}} = 375$  nm,  $\lambda_{\text{em}} = 280$  nm) and (b) **2** (4.31  $\mu\text{M}$ ,  $\text{CH}_3\text{CN}$ ,  $\lambda_{\text{exc}} = 360$  nm,  $\lambda_{\text{em}} = 275$  nm).

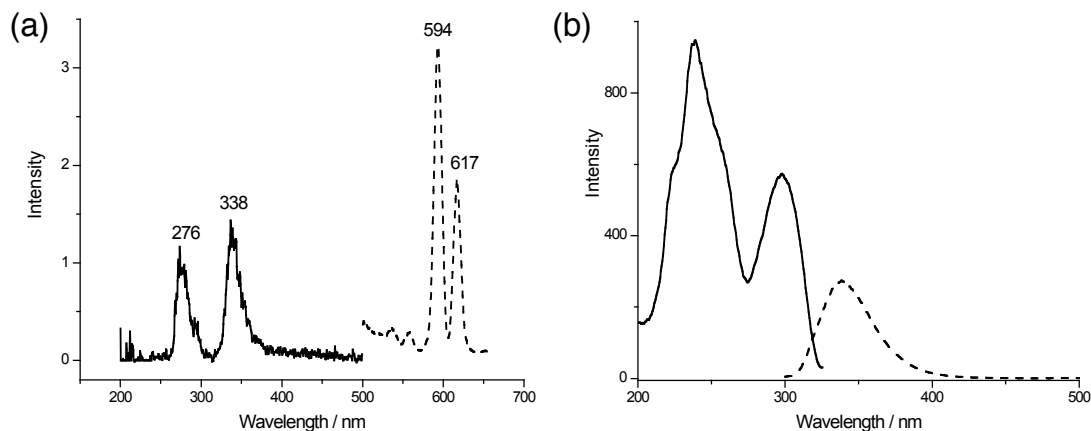

**Figure S21.** Emission (dashed line) and excitation (solid line) spectra of  $[\text{Eu}(\mathbf{2})_3]^{3+}$  in  $\text{CH}_3\text{CN}$ . (a) The phosphorescence from the  $\text{Eu}^{\text{III}}$  center (211  $\mu\text{M}$ ,  $\lambda_{\text{exc}} = 338$  nm,  $\lambda_{\text{em}} = 594$  nm) and (b) fluorescence from **2** (4.21  $\mu\text{M}$ ,  $\lambda_{\text{exc}} = 274$  nm,  $\lambda_{\text{em}} = 340$  nm) can both be observed.

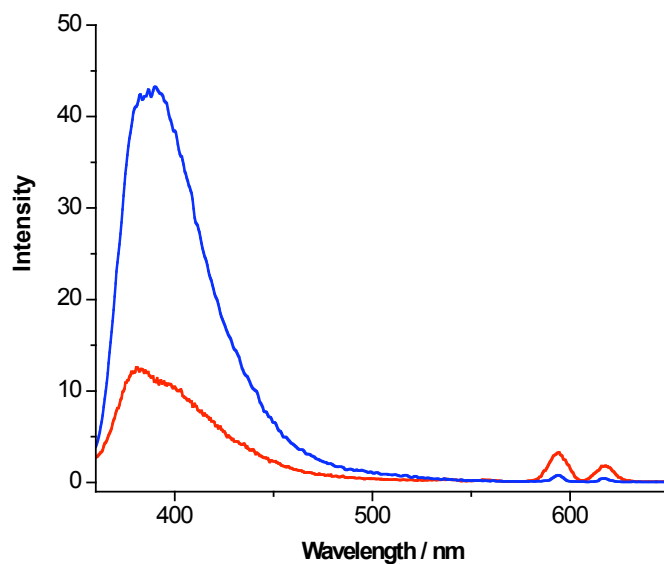

**Figure S22.** Emission spectra of  $[\text{Eu}(\mathbf{2})_3]^{3+}$  in MeCN at room temperature with excitation at 338 nm at 200 (red) and 50  $\mu\text{M}$  (blue).

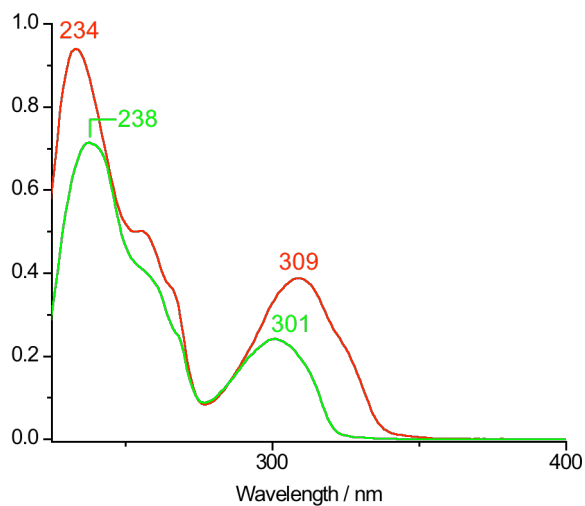

**Figure S23.** UV-Vis spectra of **2** and  $[\text{Eu}(\mathbf{2})_3]^{3+}$  in MeCN.

## S.8. $^{13}\text{C}$ NMR AND MASS SPECTRA

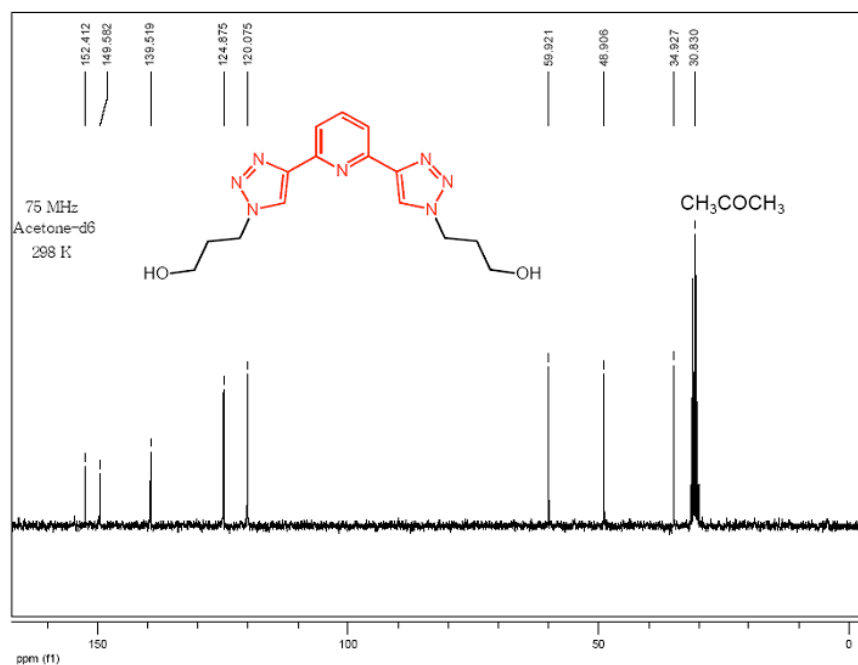

**Figure S24.** Full  $^{13}\text{C}$  NMR spectrum (75 MHz,  $\text{CD}_3\text{COCD}_3$ ) of **1**.

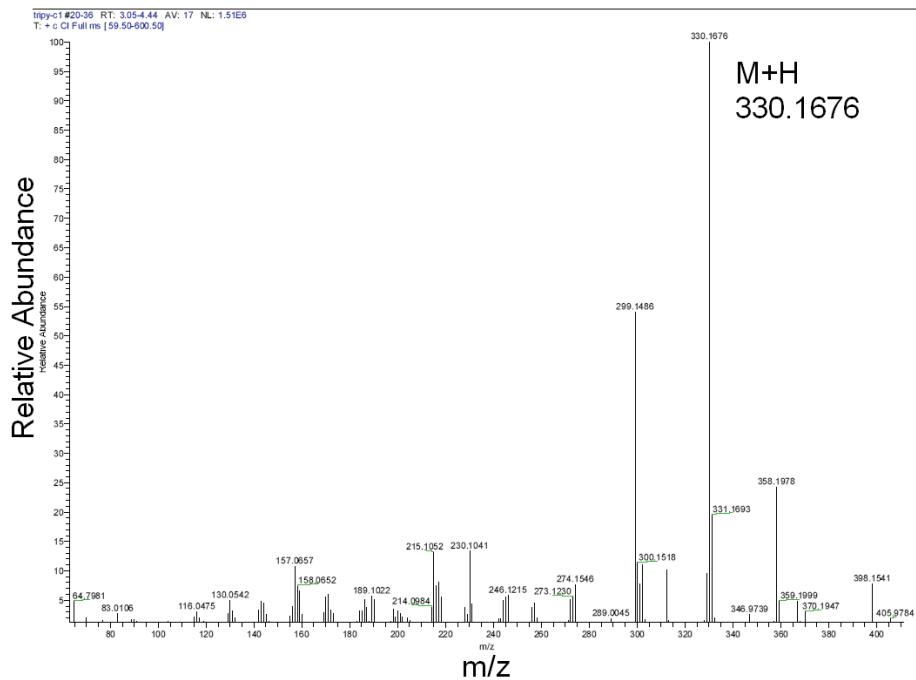

**Figure S25.** HiRes EI spectrum of **1**.

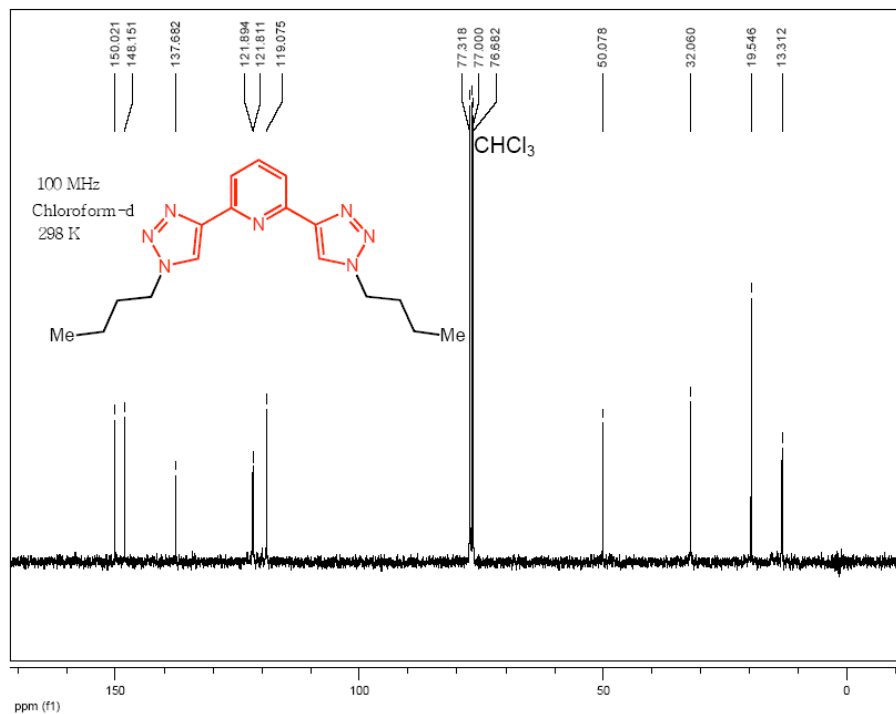

**Figure S26.** Full <sup>13</sup>C NMR spectrum (100 MHz, CDCl<sub>3</sub>) of **2**.

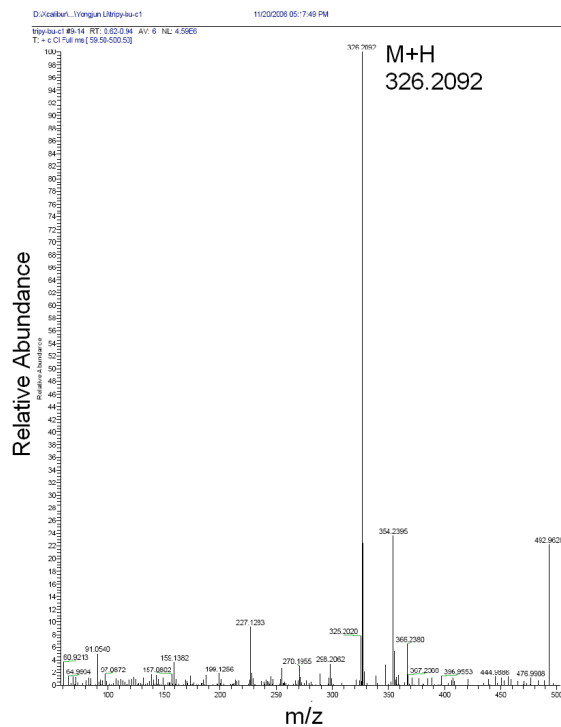

**Figure S27.** HiRes EI spectrum of **2**.



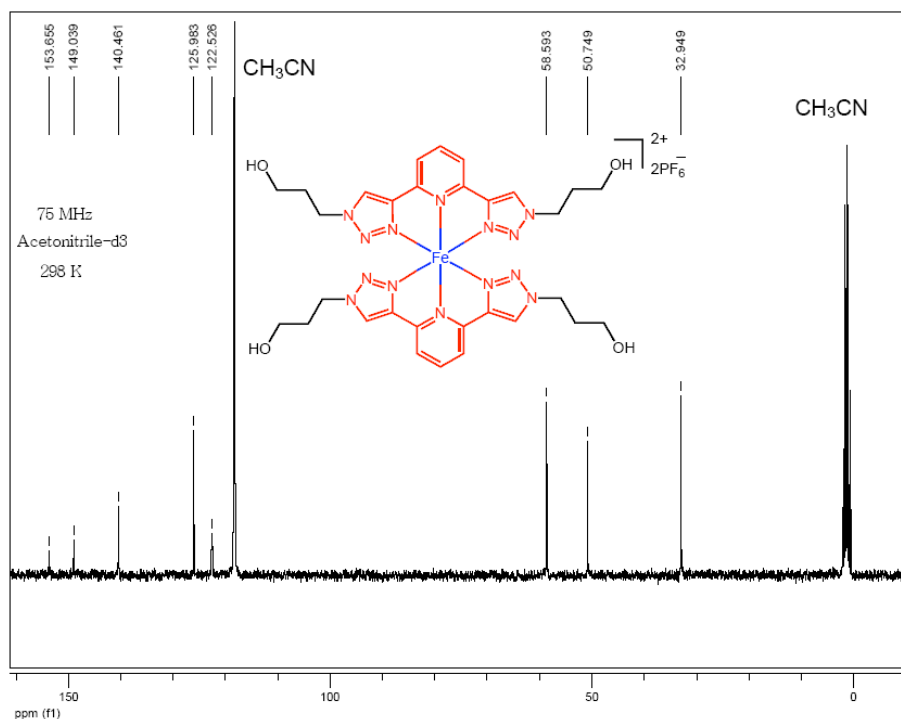

**Figure S28.** Full <sup>13</sup>C NMR spectrum (75 MHz, CD<sub>3</sub>CN) of [Fe(1)<sub>2</sub>]<sup>2+</sup>.

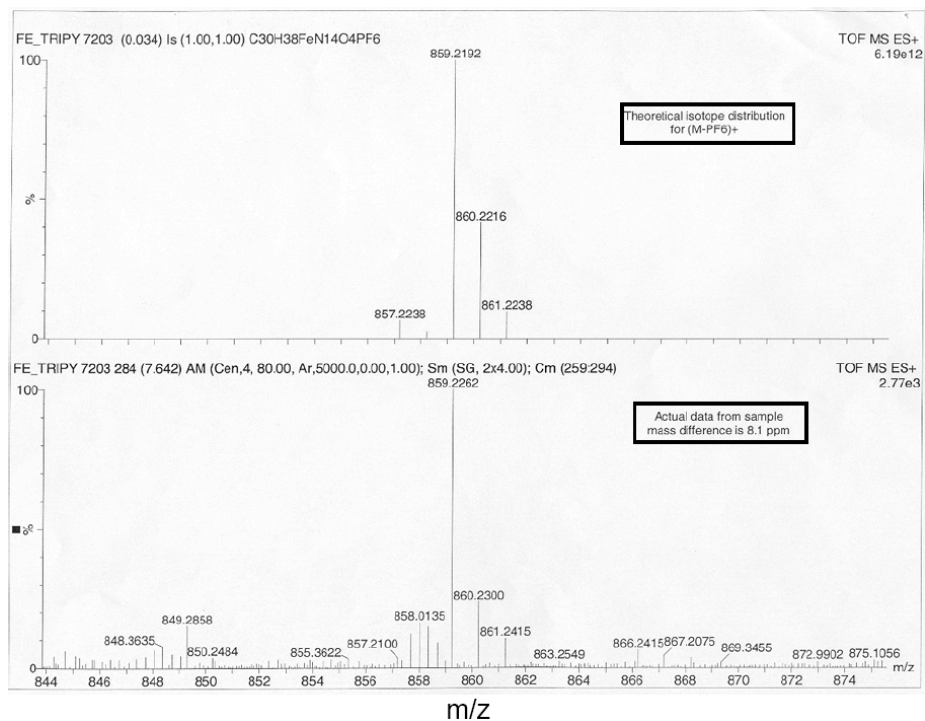

**Figure S29.** HiRes ESI spectrum of [Fe(1)<sub>2</sub>]<sup>•</sup>2PF<sub>6</sub>.

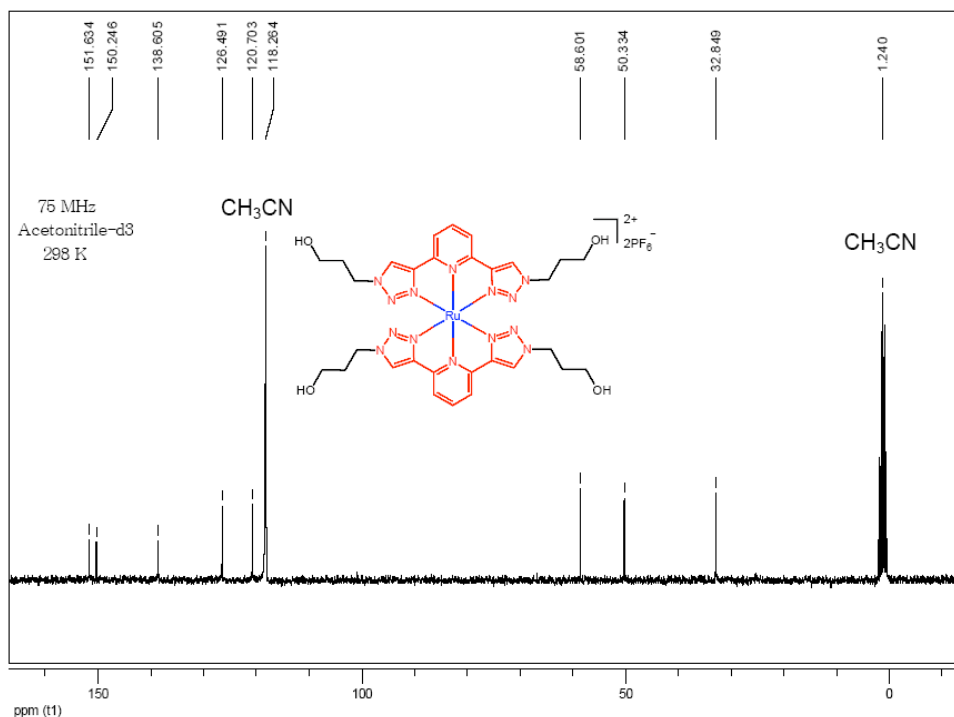

**Figure S30.** Full <sup>13</sup>C NMR spectrum (75 MHz, CD<sub>3</sub>CN) of [Ru(1)<sub>2</sub>]<sup>2+</sup>.

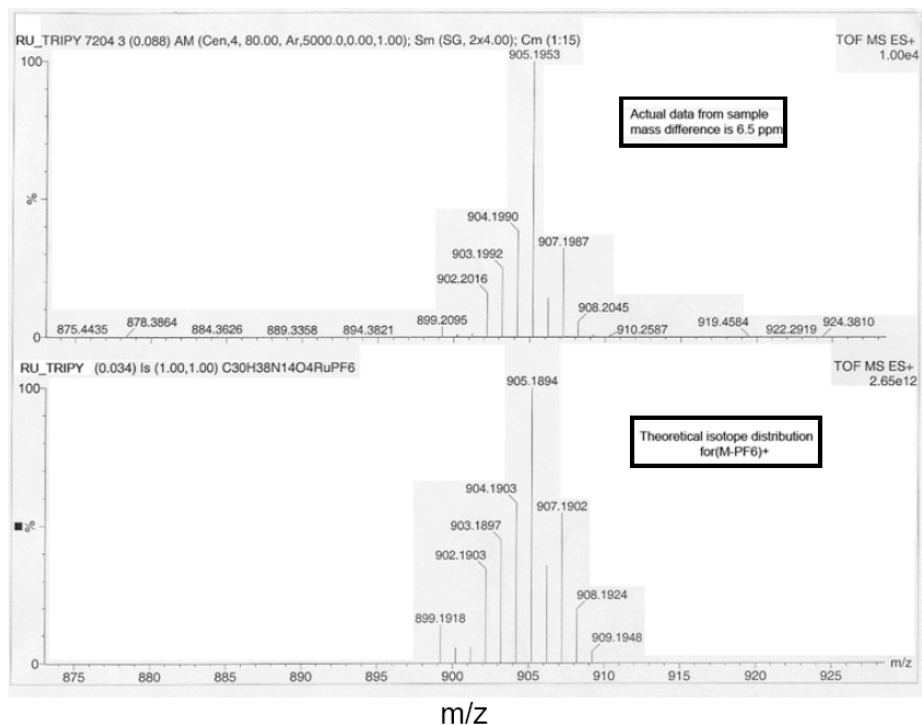

**Figure S31.** HiRes ESI spectrum of [Ru(1)<sub>2</sub>]<sup>•</sup>2PF<sub>6</sub>.

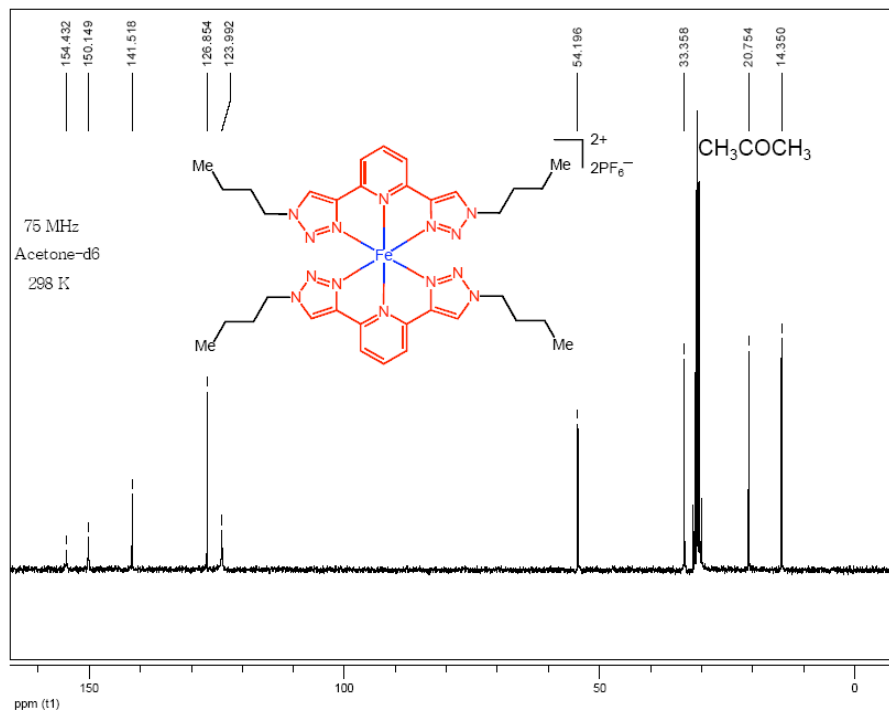

**Figure S32.** Full <sup>13</sup>C NMR spectrum (75 MHz, CD<sub>3</sub>COCD<sub>3</sub>) of [Fe(2)<sub>2</sub>]<sup>2+</sup>.

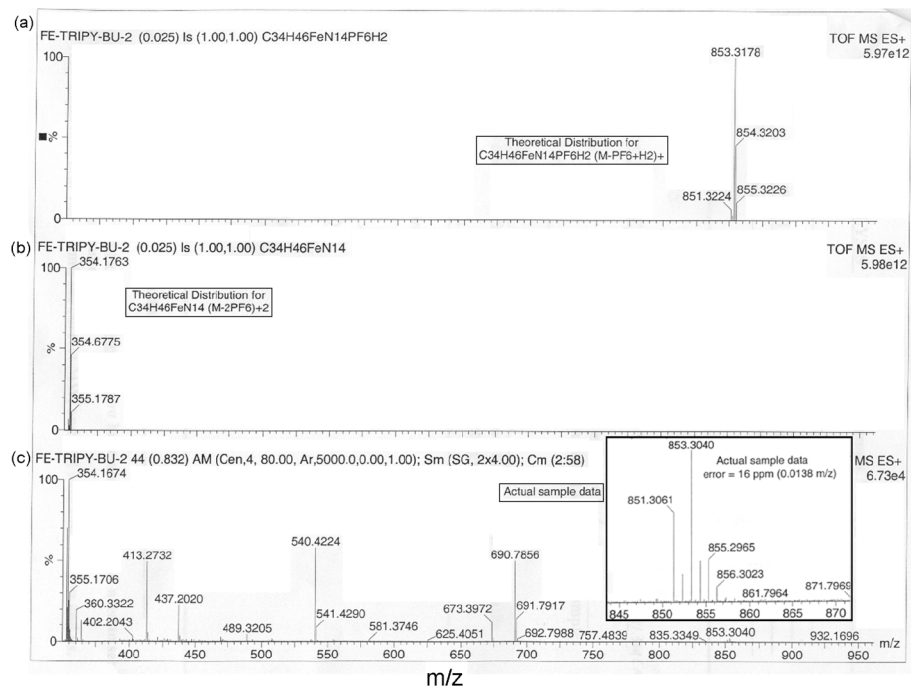

**Figure S33.** Theoretical HiRes ESI spectra of (a) the (M-PF<sub>6</sub>+H<sub>2</sub>)<sup>+</sup> ion and (b) the (M-2PF<sub>6</sub>)<sup>2+</sup> ion that are both observed in (c) the actual sample data of [Fe(2)<sub>2</sub>]<sup>2+</sup>•2PF<sub>6</sub>.

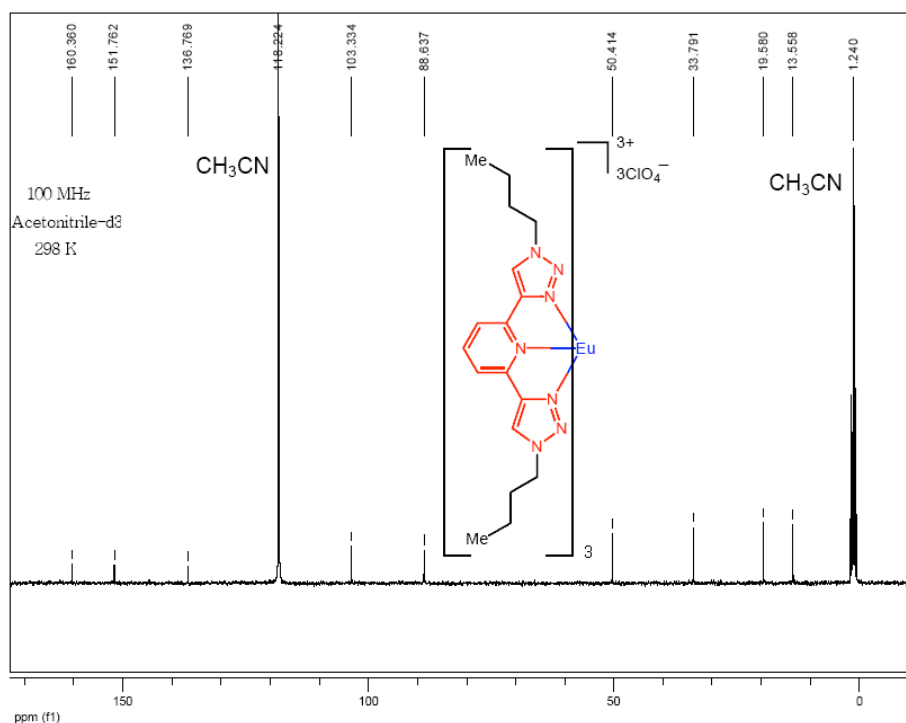

**Figure S34.** Full <sup>13</sup>C NMR spectrum (100 MHz, CD<sub>3</sub>CN) of [Eu(2)<sub>3</sub>]<sup>3+</sup>.

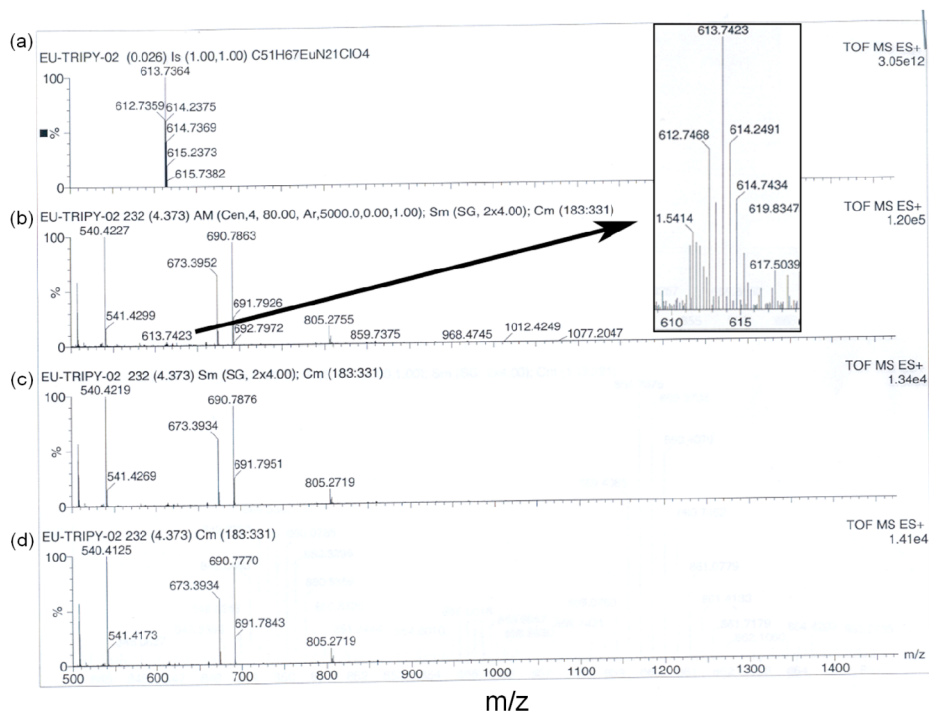

**Figure S35.** Theoretical HiRes ESI spectra of (a) the (M-2ClO<sub>4</sub>)<sup>+2</sup> ion is observed in (b,c,d) the actual sample data of [Eu(2)<sub>3</sub>]<sup>•</sup>3ClO<sub>4</sub>.

## S.9. REFERENCES

---

- 1 B. A. Dana, B. H. Robinson, and J. Simpson, *J. Organomet. Chem.*, 2002, **648**, 251.
- 2 V. Aucagne, K. D. Hänni, D. A. Leigh, P. J. Lusby and D. B. Walker, *J. Am. Chem. Soc.*, 2006, **128**, 2186.
- 3 J. H. Boyer and J. Hamer, *J. Am. Chem. Soc.*, 1955, **77**, 951.
- 4 I. P. Evans, A. Spencer and G. Wilkinson, *J. Chem. Soc., Dalton Trans.*, 1973, 204.
- 5 An empirical correction for absorption anisotropy, see: R. Blessing, *Acta Cryst. A*, **1995**, *51*, 33.
- 6 SAINT 6.1, Bruker Analytical X-Ray Systems, Madison, WI.
- 7 SHELXTL-Plus V5.10, Bruker Analytical X-Ray Systems, Madison, WI.
- 8 E. C. Constable, *Adv. Inorg. Chem.*, 1986, **30**, 69.
- 9 G. A. Jeffrey, *An Introduction to Hydrogen Bonding*, Oxford University Press, New York, 1997.
- 10 T. Steiner and W. Saenger, *Acta Cryst. B*, 1992, **48**, 819.
- 11 R. D. Chapman, R. T. Loda, J. P. Riehl and R. W. Schwartz, *Inorg. Chem.*, 1984, **23**, 1652.
- 12 (a) S. Petoud, J. C. G. Bünzli, T. Glanzman, C. Piguet, Q. Xiang and R. P. Thummel, *J. Luminesc.*, 1999, **82**, 69; (b) H. R. Mürner, E. Chassat, R. P. Thummel and J. C. G. Bünzli, *J. Chem. Soc., Dalton Tans.*, 2000, 2809.
- 13 (a) M. D. Lind, J. L. Hoard, M. J. Hamor, T. A. Hamor and J. L. Hoard, *Inorg. Chem.*, 1964, **3**, 34; (b) G. H. Cohen and J. L. Hoard, *J. Am. Chem. Soc.*, 1966, **88**, 3228; (c) E. Fleiscek and S. Hawkinson, *J. Am. Chem. Soc.*, 1967, **89**, 720; (d) X. Solnas and M. F. Altaba, *Acta Cryst. C*, 1984, **40**, 635; (e) J. M. Lopex-Alcala, M. C. Puerta-Vizcaino, G. Gonzalez-Vilchez, E. Duesler and R. E. Tapscott, *Acta Cryst. C*, 1984, **40**, 939; (f) X. Solnas, M. Font-Altaba and J. Garcia-Oricain, *Acta Cryst. C*, 1985, **41**, 525; (g) M. Mizuno, S. Funahashi, N. Nakasuka and M. Tanaka, *Inorg. Chem.*, 1991, **30**, 1550; (h) T. Mizuta, J. Wang and K. Miyoshi, *Bull. Chem. Soc. Jpn.*, 1993, **66**, 2547; (i) T. Mizuta, J. Wang and K. Miyoshi, *Inorg. Chim. Acta*, 1995, **230**, 119; (j) S. Seibig and R. van Eldik,

- Inorg. Chim. Acta*, 1998, **279**, 37; (k) R. Meier, S. A. Bedell and G. Henkel, *Inorg. Chim. Acta*, 2002, **337**, 337; (l) I. Ivanovic-Burmazovic, M. S. A. Hamza and R. van Eldik, *Inorg. Chem.*, 2002, **41**, 5150.
- 14 (a) For a 7-coordinate Ru(II) crystal structure, see: D. C. Liles and P. F. M. Verhoeven, *J. Organomet. Chem.*, 1996, **522**, 33. For 7-coordinate ruthenium centers that are inferred from experimental data, see: (b) S. M. Maddock, C. E. F. Rickard, W. Roper, and L. J. Wright, *J. Organomet. Chem.*, 1996, **510**, 267; (c) D. G. Gusev, R. Hubener, P. Burger, O. Orama and H. Berke, *J. Am. Chem. Soc.*, 1997, **119**, 3716; (d) S. M. Ng, W. H. Lam, C. C. Mak, C. W. Tsang, G. Jia, Z. Lin and C. P. Lau, *Organomet.*, 2003, **22**, 641; (e) M. Murali and M. Palaniandavar, *Dalton Trans.*, 2006, 730.
- 15 (a) B. A. Moyer and T. J. Meyer, *Inorg. Chem.*, 1981, **20**, 436; (b) K.-I. Okamoto, J. Hidaka, I. Iida, K. Higashino and K. Kanamori, *Acta Cryst. C*, 1990, **46**, 2327; (c) A. Dovletoglou, S. A. Adeyemi and T. J. Meyer, *Inorg. Chem.*, 1996, **35**, 4120.
- 16 C. Creutz, M. Chou, T. L. Netzel, M. Okumura and N. Sutin, *J. Am. Chem. Soc.*, 1980, **102**, 1309.
- 17 E. Tfouni, K. Q. Ferreira, F. G. Doro, R. S. da Silva and Z. N. da Rocha, *Coord. Chem. Rev.*, 2005, **249**, 405.
